# Supplementary material for: Functional Neuroligin-2-MDGA1 interactions differentially regulate synaptic GABAARs and cytosolic gephyrin aggregation
Source: Springer Nature journal article supplement (doi:10.1038/s42003-024-06789-z), 2024-09-17
Supplement: MOESM2 [file 42003_2024_6789_MOESM2_ESM.pdf › 42003_2024_6789_MOESM2_ESM.pdf]

## Description of Additional Supplementary Files

2

3 **File name:** Supplementary Data 1

4 **Description:** Source data for Figures 1-6

5

6 **File name:** Supplementary Data 2

7 **Description:** Source data for Supplementary Figures 1-5 and Supplementary Tables 1-6

8
