# Supplementary material for: Functional Neuroligin-2-MDGA1 interactions differentially regulate synaptic GABAARs and cytosolic gephyrin aggregation
Source: Springer Nature journal article supplement (doi:10.1038/s42003-024-06789-z), 2024-09-17
Supplement: MOESM5 [file 42003_2024_6789_MOESM5_ESM.pdf › 42003_2024_6789_MOESM5_ESM.pdf]

Reporting Summary

Nature Portfolio wishes to improve the reproducibility of the work that we publish. This form provides structure for consistency and transparency in reporting. For further information on Nature Portfolio policies, see our [Editorial Policies](#) and the [Editorial Policy Checklist](#).

Statistics

For all statistical analyses, confirm that the following items are present in the figure legend, table legend, main text, or Methods section.

|                                     |                                                                                                                                                                                                                                                                                                |
|-------------------------------------|------------------------------------------------------------------------------------------------------------------------------------------------------------------------------------------------------------------------------------------------------------------------------------------------|
| n/a                                 | Confirmed                                                                                                                                                                                                                                                                                      |
| <input type="checkbox"/>            | <input checked="" type="checkbox"/> The exact sample size ( <i>n</i> ) for each experimental group/condition, given as a discrete number and unit of measurement                                                                                                                               |
| <input type="checkbox"/>            | <input checked="" type="checkbox"/> A statement on whether measurements were taken from distinct samples or whether the same sample was measured repeatedly                                                                                                                                    |
| <input type="checkbox"/>            | <input checked="" type="checkbox"/> The statistical test(s) used AND whether they are one- or two-sided<br><i>Only common tests should be described solely by name; describe more complex techniques in the Methods section.</i>                                                               |
| <input type="checkbox"/>            | <input checked="" type="checkbox"/> A description of all covariates tested                                                                                                                                                                                                                     |
| <input type="checkbox"/>            | <input checked="" type="checkbox"/> A description of any assumptions or corrections, such as tests of normality and adjustment for multiple comparisons                                                                                                                                        |
| <input type="checkbox"/>            | <input checked="" type="checkbox"/> A full description of the statistical parameters including central tendency (e.g. means) or other basic estimates (e.g. regression coefficient) AND variation (e.g. standard deviation) or associated estimates of uncertainty (e.g. confidence intervals) |
| <input type="checkbox"/>            | <input checked="" type="checkbox"/> For null hypothesis testing, the test statistic (e.g. <i>F</i> , <i>t</i> , <i>r</i> ) with confidence intervals, effect sizes, degrees of freedom and <i>P</i> value noted<br><i>Give P values as exact values whenever suitable.</i>                     |
| <input checked="" type="checkbox"/> | <input type="checkbox"/> For Bayesian analysis, information on the choice of priors and Markov chain Monte Carlo settings                                                                                                                                                                      |
| <input checked="" type="checkbox"/> | <input type="checkbox"/> For hierarchical and complex designs, identification of the appropriate level for tests and full reporting of outcomes                                                                                                                                                |
| <input checked="" type="checkbox"/> | <input type="checkbox"/> Estimates of effect sizes (e.g. Cohen's <i>d</i> , Pearson's <i>r</i> ), indicating how they were calculated                                                                                                                                                          |

Our web collection on [statistics for biologists](#) contains articles on many of the points above.

Software and code

Policy information about [availability of computer code](#)

|                 |                                                      |
|-----------------|------------------------------------------------------|
| Data collection | <input type="text" value="No custom software used"/> |
| Data analysis   | <input type="text" value="No custom software used"/> |

For manuscripts utilizing custom algorithms or software that are central to the research but not yet described in published literature, software must be made available to editors and reviewers. We strongly encourage code deposition in a community repository (e.g. GitHub). See the Nature Portfolio [guidelines for submitting code & software](#) for further information.

Data

Policy information about [availability of data](#)

All manuscripts must include a [data availability statement](#). This statement should provide the following information, where applicable:

- Accession codes, unique identifiers, or web links for publicly available datasets
- A description of any restrictions on data availability
- For clinical datasets or third party data, please ensure that the statement adheres to our [policy](#)

## Research involving human participants, their data, or biological material

Policy information about studies with [human participants or human data](#). See also policy information about [sex, gender \(identity/presentation\), and sexual orientation](#) and [race, ethnicity and racism](#).

|                                                                    |                                         |
|--------------------------------------------------------------------|-----------------------------------------|
| Reporting on sex and gender                                        | No human research participants involved |
| Reporting on race, ethnicity, or other socially relevant groupings | No human research participants involved |
| Population characteristics                                         | No human research participants involved |
| Recruitment                                                        | No human research participants involved |
| Ethics oversight                                                   | No human research participants involved |

Note that full information on the approval of the study protocol must also be provided in the manuscript.

## Field-specific reporting

Please select the one below that is the best fit for your research. If you are not sure, read the appropriate sections before making your selection.

☒ Life sciences ☐ Behavioural & social sciences ☐ Ecological, evolutionary & environmental sciences

For a reference copy of the document with all sections, see [nature.com/documents/nr-reporting-summary-flat.pdf](https://nature.com/documents/nr-reporting-summary-flat.pdf)

## Life sciences study design

All studies must disclose on these points even when the disclosure is negative.

|                 |                                                                                                                         |
|-----------------|-------------------------------------------------------------------------------------------------------------------------|
| Sample size     | This information is provided in the figure legends and / or the section on Statistical Analysis in the Methods section. |
| Data exclusions | This information is provided in the figure legends and / or the section on Statistical Analysis in the Methods section. |
| Replication     | This information is provided in the section on Experimental Subjects in the Methods section.                            |
| Randomization   | This information is provided in the section on Experimental Subjects in the Methods section.                            |
| Blinding        | This information is provided in the section on Experimental Subjects in the Methods section.                            |

## Behavioural & social sciences study design

All studies must disclose on these points even when the disclosure is negative.

|                   |                |
|-------------------|----------------|
| Study description | Not applicable |
| Research sample   | Not applicable |
| Sampling strategy | Not applicable |
| Data collection   | Not applicable |
| Timing            | Not applicable |
| Data exclusions   | Not applicable |
| Non-participation | Not applicable |
| Randomization     | Not applicable |

# Ecological, evolutionary & environmental sciences study design

All studies must disclose on these points even when the disclosure is negative.

|                          |                |
|--------------------------|----------------|
| Study description        | Not applicable |
| Research sample          | Not applicable |
| Sampling strategy        | Not applicable |
| Data collection          | Not applicable |
| Timing and spatial scale | Not applicable |
| Data exclusions          | Not applicable |
| Reproducibility          | Not applicable |
| Randomization            | Not applicable |
| Blinding                 | Not applicable |

Did the study involve field work? ☐ Yes ☒ No

## Field work, collection and transport

|                        |                |
|------------------------|----------------|
| Field conditions       | Not applicable |
| Location               | Not applicable |
| Access & import/export | Not applicable |
| Disturbance            | Not applicable |

## Reporting for specific materials, systems and methods

We require information from authors about some types of materials, experimental systems and methods used in many studies. Here, indicate whether each material, system or method listed is relevant to your study. If you are not sure if a list item applies to your research, read the appropriate section before selecting a response.

### Materials & experimental systems

|                                     |                                                                 |
|-------------------------------------|-----------------------------------------------------------------|
| n/a                                 | Involved in the study                                           |
| <input type="checkbox"/>            | <input checked="" type="checkbox"/> Antibodies                  |
| <input checked="" type="checkbox"/> | <input type="checkbox"/> Eukaryotic cell lines                  |
| <input checked="" type="checkbox"/> | <input type="checkbox"/> Palaeontology and archaeology          |
| <input type="checkbox"/>            | <input checked="" type="checkbox"/> Animals and other organisms |
| <input checked="" type="checkbox"/> | <input type="checkbox"/> Clinical data                          |
| <input checked="" type="checkbox"/> | <input type="checkbox"/> Dual use research of concern           |
| <input checked="" type="checkbox"/> | <input type="checkbox"/> Plants                                 |

### Methods

|                                     |                                                 |
|-------------------------------------|-------------------------------------------------|
| n/a                                 | Involved in the study                           |
| <input checked="" type="checkbox"/> | <input type="checkbox"/> ChIP-seq               |
| <input checked="" type="checkbox"/> | <input type="checkbox"/> Flow cytometry         |
| <input checked="" type="checkbox"/> | <input type="checkbox"/> MRI-based neuroimaging |

## Antibodies

|                 |                                                                                                                                         |
|-----------------|-----------------------------------------------------------------------------------------------------------------------------------------|
| Antibodies used | This information is available in the section on Immunohistochemistry in the Methods section.                                            |
| Validation      | All antibodies were validated, either here or previously, using either knockout tissue (Nlgn2, MDGA1) or a no primary antibody control. |

## Eukaryotic cell lines

Policy information about [cell lines and Sex and Gender in Research](#)

|                                                                      |                 |
|----------------------------------------------------------------------|-----------------|
| Cell line source(s)                                                  | Not applicable. |
| Authentication                                                       | Not applicable. |
| Mycoplasma contamination                                             | Not applicable. |
| Commonly misidentified lines<br>(See <a href="#">ICLAC</a> register) | Not applicable. |

## Palaeontology and Archaeology

|                                                                                                                                                 |                 |
|-------------------------------------------------------------------------------------------------------------------------------------------------|-----------------|
| Specimen provenance                                                                                                                             | Not applicable. |
| Specimen deposition                                                                                                                             | Not applicable. |
| Dating methods                                                                                                                                  | Not applicable. |
| <input type="checkbox"/> Tick this box to confirm that the raw and calibrated dates are available in the paper or in Supplementary Information. |                 |
| Ethics oversight                                                                                                                                | Not applicable. |

Note that full information on the approval of the study protocol must also be provided in the manuscript.

## Animals and other research organisms

Policy information about [studies involving animals](#); [ARRIVE guidelines](#) recommended for reporting animal research, and [Sex and Gender in Research](#)

|                         |                                                                                               |
|-------------------------|-----------------------------------------------------------------------------------------------|
| Laboratory animals      | This information is available in the section on Experimental Subjects in the Methods section. |
| Wild animals            | Not applicable.                                                                               |
| Reporting on sex        | This information is available in the section on Experimental Subjects in the Methods section. |
| Field-collected samples | Not applicable.                                                                               |
| Ethics oversight        | This information is available in the section on Experimental Subjects in the Methods section. |

Note that full information on the approval of the study protocol must also be provided in the manuscript.

## Clinical data

Policy information about [clinical studies](#)

All manuscripts should comply with the ICMJE [guidelines for publication of clinical research](#) and a completed [CONSORT checklist](#) must be included with all submissions.

|                             |                 |
|-----------------------------|-----------------|
| Clinical trial registration | Not applicable. |
| Study protocol              | Not applicable. |
| Data collection             | Not applicable. |
| Outcomes                    | Not applicable. |

## Dual use research of concern

Policy information about [dual use research of concern](#)

### Hazards

Could the accidental, deliberate or reckless misuse of agents or technologies generated in the work, or the application of information presented in the manuscript, pose a threat to:

- |                                     |                                                     |
|-------------------------------------|-----------------------------------------------------|
| No                                  | Yes                                                 |
| <input checked="" type="checkbox"/> | <input type="checkbox"/> Public health              |
| <input checked="" type="checkbox"/> | <input type="checkbox"/> National security          |
| <input checked="" type="checkbox"/> | <input type="checkbox"/> Crops and/or livestock     |
| <input checked="" type="checkbox"/> | <input type="checkbox"/> Ecosystems                 |
| <input checked="" type="checkbox"/> | <input type="checkbox"/> Any other significant area |

## Experiments of concern

Does the work involve any of these experiments of concern:

- |                                     |                                                                                                      |
|-------------------------------------|------------------------------------------------------------------------------------------------------|
| No                                  | Yes                                                                                                  |
| <input checked="" type="checkbox"/> | <input type="checkbox"/> Demonstrate how to render a vaccine ineffective                             |
| <input checked="" type="checkbox"/> | <input type="checkbox"/> Confer resistance to therapeutically useful antibiotics or antiviral agents |
| <input checked="" type="checkbox"/> | <input type="checkbox"/> Enhance the virulence of a pathogen or render a nonpathogen virulent        |
| <input checked="" type="checkbox"/> | <input type="checkbox"/> Increase transmissibility of a pathogen                                     |
| <input checked="" type="checkbox"/> | <input type="checkbox"/> Alter the host range of a pathogen                                          |
| <input checked="" type="checkbox"/> | <input type="checkbox"/> Enable evasion of diagnostic/detection modalities                           |
| <input checked="" type="checkbox"/> | <input type="checkbox"/> Enable the weaponization of a biological agent or toxin                     |
| <input checked="" type="checkbox"/> | <input type="checkbox"/> Any other potentially harmful combination of experiments and agents         |

## Plants

|                       |                                              |
|-----------------------|----------------------------------------------|
| Seed stocks           | <input type="text" value="Not applicable."/> |
| Novel plant genotypes | <input type="text" value="Not applicable."/> |
| Authentication        | <input type="text" value="Not applicable."/> |

## ChIP-seq

### Data deposition

- ☐ Confirm that both raw and final processed data have been deposited in a public database such as [GEO](#).
- ☐ Confirm that you have deposited or provided access to graph files (e.g. BED files) for the called peaks.

|                                                                            |                                              |
|----------------------------------------------------------------------------|----------------------------------------------|
| Data access links<br><small>May remain private before publication.</small> | <input type="text" value="Not applicable."/> |
| Files in database submission                                               | <input type="text" value="Not applicable."/> |
| Genome browser session<br><small>(e.g. <a href="#">UCSC</a>)</small>       | <input type="text" value="Not applicable."/> |

### Methodology

|                         |                                              |
|-------------------------|----------------------------------------------|
| Replicates              | <input type="text" value="Not applicable."/> |
| Sequencing depth        | <input type="text" value="Not applicable."/> |
| Antibodies              | <input type="text" value="Not applicable."/> |
| Peak calling parameters | <input type="text" value="Not applicable."/> |
| Data quality            | <input type="text" value="Not applicable."/> |
| Software                | <input type="text" value="Not applicable."/> |

## Flow Cytometry

### Plots

Confirm that:

- ☐ The axis labels state the marker and fluorochrome used (e.g. CD4-FITC).
- ☐ The axis scales are clearly visible. Include numbers along axes only for bottom left plot of group (a 'group' is an analysis of identical markers).
- ☐ All plots are contour plots with outliers or pseudocolor plots.
- ☐ A numerical value for number of cells or percentage (with statistics) is provided.

### Methodology

- Sample preparation
- Instrument
- Software
- Cell population abundance
- Gating strategy

☐ Tick this box to confirm that a figure exemplifying the gating strategy is provided in the Supplementary Information.

## Magnetic resonance imaging

### Experimental design

- Design type
- Design specifications
- Behavioral performance measures

### Acquisition

- Imaging type(s)
- Field strength
- Sequence & imaging parameters
- Area of acquisition
- Diffusion MRI ☐ Used ☐ Not used

### Preprocessing

- Preprocessing software
- Normalization
- Normalization template
- Noise and artifact removal
- Volume censoring

### Statistical modeling & inference

- Model type and settings
- Effect(s) tested
- Specify type of analysis: ☐ Whole brain ☐ ROI-based ☐ Both

Statistic type for inference

Not applicable.

(See [Eklund et al. 2016](#))

Correction

Not applicable.

## Models & analysis

- |                                     |                                                                       |
|-------------------------------------|-----------------------------------------------------------------------|
| n/a                                 | Involvement in the study                                              |
| <input checked="" type="checkbox"/> | <input type="checkbox"/> Functional and/or effective connectivity     |
| <input type="checkbox"/>            | <input checked="" type="checkbox"/> Graph analysis                    |
| <input checked="" type="checkbox"/> | <input type="checkbox"/> Multivariate modeling or predictive analysis |

Functional and/or effective connectivity

Not applicable.

Graph analysis

All relevant parameters are reported in the statistical analysis section or the figure legends.

Multivariate modeling and predictive analysis

Not applicable.
