# Supplementary material for: Functional Neuroligin-2-MDGA1 interactions differentially regulate synaptic GABAARs and cytosolic gephyrin aggregation
Source: Commun Biol. 2024 Sep 17;7:1157. doi: 10.1038/s42003-024-06789-z (PMC11405390; doi:10.1038/s42003-024-06789-z)
Supplement: Supplementary file 3 — Supplementary Data 1 [file 42003_2024_6789_MOESM3_ESM.xlsx]

## Sheet: Fig.2
Fig. 2d																Fig. 2g
Gephyrin NUMBER					GABA NUMBER					VIAAT NUMBER						Gephyrin NUMBER					GABA NUMBER					VIAAT NUMBER
Stratum pyramidale					Stratum pyramidale					Stratum pyramidale						Stratum radiatum					Stratum radiatum					Stratum radiatum
WT	Nlgn2 KO	MDGA1 KO	dKO		WT	Nlgn2 KO	MDGA1 KO	dKO		WT	Nlgn2 KO	MDGA1 KO	dKO			WT	Nlgn2 KO	MDGA1 KO	dKO		WT	Nlgn2 KO	MDGA1 KO	dKO		WT	Nlgn2 KO	MDGA1 KO	dKO
83.0741	99.4311	124.17	48.5283		85.675	49.312	62.46	44.962		65.736	84.869	133.237	120.812			92.522	97.148	77.382	43.895		89.049	63.351	107.945	57.136		105.531	95.019	51.407	70.828
141.634	85.6782	84.0898	43.8008		146.564	82.82	89.773	32.443		114.983	105.255	66.581	117.835			113.659	114.427	40.682	42.18		126.388	87.732	47.06	56.301		84.662	57.78	73.264	107.078
89.4563	86.7033	96.8464	82.1972		93.677	70.518	95.837	70.319		130.258	3.571	140.573	130.252			100.414	79.325	67.109	64.1		92.856	77.41	75.402	71.813		144.955	55.596	46.62	75.614
111.585	31.208	129.627	82.7833		100.109	65.125	82.877	63.216		106.555	128.805	65.797	103.497			151.752	44.945	83.341	30.912		129.701	44.703	89.181	53.897		101.77	118.147	47.134	55.733
51.6343	88.1265	106.114	109.328		67.322	85.774	80.599	88.313		93.785	102.523	85.481	122.865			73.599	77.568	75.357	84.425		82.192	77.672	69.409	88.208		83.873	115.019	36.765	87.128
108.332	71.2718	94.4626	81.1371		94.136	77.672	80.432	71.88		77.912	94.463	128.693	103.586			116.646	75.433	89.374	29.495		113.208	57	64.832	82.441		49.937	111.573	103.225	58.049
73.8109	89.3101	115.82	76.262		82.304	83.477	44.735	78.074		110.772	28.124	163.911	101.847			96.235	81.428	83.382	49.903		101.56	65.224	88.76	61.937		116.477	186.427	9.927	80.303
140.474	47.6497	63.8198	103.26		125.522	94.154	84.439	59.876								55.173	55.173	122.866			79.174	87.507	63.364	87.436		112.795	29.881	99.806
					104.69	58.346		76.812													85.87	52.219	77.71	101.682
Fig. 2e																Fig. 2h
Gephyrin SIZE					GABA SIZE					VIAAT SIZE						Gephyrin SIZE					GABA SIZE					VIAAT SIZE
Stratum pyramidale					Stratum pyramidale					Stratum pyramidale						Stratum radiatum					Stratum radiatum					Stratum radiatum
WT	Nlgn2 KO	MDGA1 KO	dKO		WT	Nlgn2 KO	MDGA1 KO	dKO		WT	Nlgn2 KO	MDGA1 KO	dKO			WT	Nlgn2 KO	MDGA1 KO	dKO		WT	Nlgn2 KO	MDGA1 KO	dKO		WT	Nlgn2 KO	MDGA1 KO	dKO
94.48	136.162	96.0696	103.615		80.367	70.945	95.607	89.789		102.166	160.938	75.358	77.9			94.914	88.467	101.412	87.717		92.27	78.136	94.107	78.136		102.308	105.701	83.057	79.924
112.237	106.096	104.581	88.6467		126.717	90.039	61.822	58.13		98.467	99.698	81.508	102.566			108.289	104.712	86.067	73.441		107.251	83.132	81.469	70.796		93.074	92.326	93.467	92.122
103.172	100.614	109.566	94.6824		94.903	69.757	97.211	74.837		110.351	90.801	109.437	87.232			97.599	94.647	92.209	88.055		106.783	67.39	86.535	81.941		107.406	89.008	86.051	88.525
108.035	88.3105	109.903	97.1371		108.942	61.819	97.532	68.416		93.477	106.924	81.215	87.448			100.724	81.64	99.088	91.058		96.502	57.354	85.577	62.794		107.41	104.89	81.734	76.956
96.7909	90.325	93.9576	106.03		84.641	82.963	78.92	90.184		94.69	95.507	93.29	103.663			96.16	94.035	89.113	93.201		99.843	93.055	68.862	84.23		105.518	95.875	83.852	85.745
101.461	106.572	104.493	101.058		90.727	84.581	84.231	77.169		100.848	95.222	95.391	100.634			95.774	94.528	89.053	93.155		107.839	82.854	82.966	76.985		90.04	104.579	92.298	84.073
99.07	102.436	94.758	97.0504		83.022	86.188	102.272	65.228			68.117	112.164	104.809			106.539	90.051	95.735	80.186		82.464	74.818	89.567	70.424		100.175	115.194	79.941	75.681
84.7541	116.976		106.561		127.29	78.426	64.963	66.03									74.736	93.128			107.048	87.297	83.737	89.15		94.068	78.212	103.043	95.667
					103.391	77.678	101.364	54.276														54.676	74.501

## Sheet: Fig.3
Fig. 3e					Fig. 3f
Gephyrin aggregates NUMBER					Gephyrin aggregates TOTAL AREA
WT	Nlgn2 KO	MDGA1 KO	dKO		WT	Nlgn2 KO	MDGA1 KO	dKO
82.626	158.897	67.09	108.05		65.425	197.002	54.847	115.348
118.527	129.444	82.137	86.556		103.839	169.581	88.586	70.616
90.431	113.282	110.851	102.1		101.489	134.867	88.735	107.531
97.087	132.483	78.883	108.211		99.291	150.35	82.424	100.557
131.274	124.117	69.607	91.666		101.573	136.482	58.475	75.717
96.835	151.39	57.283	111.156		110.405	173.094	49.909	108.046
98.096	123.348	90.326	104.894		117.978	134.303	85.539	102.375
85.125		51.523				76.113	46.229
Fig. 3h
Gephyrin aggregates/Mdga1COLOCALIZATION (%)
No puncta			1 punctum			2 ≤ 6 Puncta
WT	Nlgn2 KO		WT	Nlgn2 KO		WT	Nlgn2 KO
52.6978	31.8502		38.9783	29.6318		8.32391	38.518
28.2608	36.9877		26.4507	32.6404		45.2885	30.3719
48.4177	30.7375		51.5823	25.488		0	43.7746
17.2512	39.4039		23.8626	32.7851		58.8862	27.8109

## Sheet: Fig.4
Fig. 4c																																									Fig. 4d
Frequency of APs (s-1)					Frequency of APs (s-1)					Frequency of APs (s-1)					Frequency of APs (s-1)					Frequency of APs (s-1)					Frequency of APs (s-1)					Frequency of APs (s-1)					Frequency of APs (s-1)
25 pA current injection					50 pA current injection					75 pA current injection					100 pA current injection					150 pA current injection					200 pA current injection					300 pA current injection					400 pA current injection						Maximum rate of rise (mV/ms)
WT	Nlgn2 KO	MDGA1 KO	dKO		WT	Nlgn2 KO	MDGA1 KO	dKO		WT	Nlgn2 KO	MDGA1 KO	dKO		WT	Nlgn2 KO	MDGA1 KO	dKO		WT	Nlgn2 KO	MDGA1 KO	dKO		WT	Nlgn2 KO	MDGA1 KO	dKO		WT	Nlgn2 KO	MDGA1 KO	dKO		WT	Nlgn2 KO	MDGA1 KO	dKO			WT	Nlgn2 KO	MDGA1 KO	dKO
0	0	0	0		3.75	0	0	5		7.5	2.5	0	7.5		6.66667	10.8333	0	9.16667		15	16.25	5	18.75		10	21.25	8.75	25		7.5	27.5	20	32.5		17.5	30	22.5	37.5			650	614.8	556.4	594.8
0	0	0	5		0	2.5	0	10		0	5	2.5	12.5		5	10.8333	2.5	15.8333		10	16.25	5	21.25		17.5	21.25	8.75	28.75		30	23.75	10	35		37.5	30	7.5	40			649.7	517	519.5	597.1
0	0	2.5	0		5	6.25	5	7.5		0	10	7.5	7.5		12.5	15.8333	8.33333	15		21.25	23.75	13.75	20		31.25	30	20	26.25		40	40	15	35		47.5	42.5	30	42.5			459.4	514.7	459.4	803.1
0	0	0	0		10	0	3.75	0		2.5	0	10	2.5		12.5	10	15	14.1667		17.5	18.75	18.75	18.75		25	26.25	26.25	26.25		30	33.75	33.75	36.25		0	40	40	42.5			585.2	635.5	496.6	678.1
0	0	7.5	0		10	0	13.75	6.25		15	0	17.5	12.5		23.3333	3.75	20	20		28.75	10	27.5	27.5		37.5	12.5	36.25	36.25		45	27.5	43.75	46.25		52.5	32.5	57.5	55			514.1	686.1	602.5	846.2
0	0	0	0		0	0	5	5		2.5	0	10	5		6.25	0	19.1667	15		12.5	2.5	27.5	21.25		12.5	8.75	33.75	30		26.25	23.75	45	38.75		30	35	47.5	45			629.1	740.4	671.5	705.8
0	0	0	0		0	0	10	0		0	0	20	0		0	5	21.6667	10		8.75	9.16667	27.5	20		18.75	17.5	31.25	28.75		30	22.5	33.75	41.25		37.5	25	35	47.5			489.4	390.9	519.3	861.3
0	0	0	0		2.5	0	8.75	7.5		5	0	12.5	10		7.5	7.5	16.6667	18.3333		12.5	12.5	20	28.75		12.5	20	23.75	33.75		23.75	26.25	28.75	38.75		27.5	30	0	35			608.7	402.03	480.2	651.6
0	0	0	0		0	0	0	7.5		0	0	0	12.5		2.5	0	2.5	20.8333		11.25	6.25	6.25	28.75		21.25	16.25	10	35		31.25	26.25	20	48.75		40	32.5	27.5	55			655.6	447.7	643.6	800.9
0	0	0	0		2.5	2.5	0	0		0	7.5	0	0		12.5	11.6667	0	0		25	16.25	2.5	6.25		27.5	22.5	3.75	18.75		35	28.75	16.25	31.25		45	35	28.75	40			701.8	470.2	693.5	759.7
0	0	0	0		0	0	0	2.5		0	5	0	10		5	6.66667	0	15		11.25	15	12.5	18.75		21.25	21.25	20	22.5		30	31.25	28.75	27.5		37.5	37.5	35	27.5			565.3	577	735.5	586.3
0	0	0	0		2.5	3.75	0	2.5		5	7.5	0	10		11.6667	13.3333	0	13.3333		18.75	18.75	7.5	21.25		25	25	10	28.75		30	30	23.75	37.5		30	32.5	35	45			576.7	719.7	736.1	649.6
0	0	0	0		0	0	2.5	0		0	0	7.5	10		7.5	8.75	12.5	13.3333		16.25	13.75	25	21.25		23.75	25	30	30		32.5	35	42.5	38.75		37.5	42.5	50	47.5			542	579.2	660.7	822.1
0	0	0	0		2.5	0	0	12.5		0	7.5	2.5	7.5		9.16667	15	8.33333	16.6667		16.25	21.25	16.25	23.75		22.5	31.25	25	30		27.5	41.25	33.75	37.5		30	47.5	40	42.5			523.8	755.7	687.7	660.5
0		0	0		8.75		0	3.75		17.5		2.5	12.5		19.1667		8.75	20.8333		27.5		17.5	30		35		27.5	38.75		41.25		38.75	51.25		47.5		45	57.5			588.9	827.3	624.7	741.8
0		0	0		0		0	10		5		0	17.5		8.33333		5	25.8333		16.25		13.75	33.75		26.25		18.75	45		35		30	55		42.5		35	65			503		747.5	671.7
0		0	0		0		12.5	2.5		2.5		17.5	10		7.5		24.1667	19.1667		11.25		32.5	25		15		38.75	33.75		21.25		47.5	43.75		22.5		52.5	52.5			427.3		684.6	824.1
0		0	0		2.5		0	0		5		0	0		6.66667		10.8333	7.5		13.75		20	13.75		20		28.75	25		25		37.5	33.75		30		45	40			616.4		704.2	698.6
0		0	2.5		2.5		0	7.5		5		10	15		9.16667		25	17.5		16.25		35	23.75		22.5		51.25	30		31.25		61.25	37.5		37.5		70	45			694.3		807.3	726.2
5		0			11.25		6.25			17.5		10			22.5		15			27.5		20			35		26.25			42.5		33.75			47.5		40				667.8		527.1
0		0			8.75		3.75			15		10			19.1667		12.5			25		22.5			31.25		26.25			40		33.75			45		40						676
		0					0					0					5.83333					16.25					26.25					33.75					40						593.3
		0					2.5					0					11.25					21.25					27.5					37.5					42.5						527.8
		0					2.5					5					12.5					17.5					25					28.75					35
Fig. 4f						Fig. 4h						Fig. 4j						Fig. 4l						Fig. 4n						Fig. 4o
sIPSC frequency (s-1)						sIPSC amplitude (pA)						mIPSC frequency (s-1)						mIPSC amplitude (pA)						≤400µs mIPSC amplitude (pA)						>400 µs mIPSC amplitude (pA)
WT	Nlgn2 KO	MDGA1 KO	dKO			WT	Nlgn2 KO	MDGA1 KO	dKO			WT	Nlgn2 KO	MDGA1 KO	dKO			WT	Nlgn2 KO	MDGA1 KO	dKO			WT	Nlgn2 KO	MDGA1 KO	dKO			WT	Nlgn2 KO	MDGA1 KO	dKO
2.47875	1.405	5.546	2.47875			51.3518	26.992	63.6219	46.6172			4.646	2.906	3.1655	1.95775			38.368	29.04	33.545	29.792			41.501	33.815	39.886	35.549			28.541	25.521	26.436	26.768
4.2365	1.3125	1.20525	1.61125			45.1745	44.644	44.7493	62.4216			6.2885	4.06825	4.615	2.00025			54.358	24.697	35.723	28.338			64.657	29.035	41.486	27.385			44.778	22.676	28.819	29.972
4.4805	1.89033	1.5265	4.392			50.2563	27.685	47.6289	30.6459			5.60225	3.12925	3.67375	2.59625			57.889	28.819	36.597	30.92			69.512	32.31	40.989	34.782			41.094	28.156	28.55	27.413
4.09025	1.2395	2.01325	2.4085			33.056	23.8777	51.3201	28.3926			4.254	4.53575	3.04	3.497			35.011	28.95	29.733	25.084			40.401	29.692	38.212	27.845			31.58	29.155	26.985	31.258
4.23733	2.0005	3.08875	4.19			63.9762	33.2489	47.9286	44.4666			4.4375	2.02025	4.3665	4.61075			32.218	30.875	37.665	31.682			37.86	34.403	44.166	35.992			28.263	29.18	33.619	24.639
5.993	1.00477	4.8085	2.4165			67.7184	25.1043	41.5122	45.5715			5.4105	3.15275	3.86675	2.35325			55.712	23.961	36.86	26.357			70.361	26.904	43.406	27.46			42.869	22.251	31.598	30.811
5.0065	0.941875	5.08075	1.65925			53.7876	35.9066	48.0106	50.5168			5.40975	1.2075	4.30267	3.487			36.379	24.546	37.198	26.973			44.481	29.126	44.648	31.293			32.234	21.062	28.074	26.745
3.90725	1.68575	3.89875	1.62875			46.3094	27.9079	47.3934	27.1913			3.12925	1.609	3.35875	4.60475			33.501	24.262	34.408	29.009			39.257	29.06	39.505	33.491			31.129	21.862	29.599	24.652
5.86325	3.22475	3.77275	2.60575			46.6688	31.0396	46.8802	39.732			3.91375	1.54775	2.447	2.41075			34.261	26.114	37.22	27.906			37.942	31.848	47.481	31.106			34.028	22.671	31.847	26.926
2.80425	1.2105	3.00825	4.0625			43.4307	28.2478	63.6788	39.4012			3.05275	2.5105	3.60525	2.53625			52.117	30.975	31.027	29.386			58.574	37.257	36.467	34.413			35.977	29.083	26.993	27.462
1.973	1.82225	4.47533	2.12575			63.1624	30.4104	33.677	27.0955			4.3685	1.7815	4.52575	2.29925			42.645	29.56	43.429	27.253			47.796	34.053	51.878	30.498			33.182	27.998	33.763	27.697
4.85125	2.113	4.44075	1.87933			56.4747	23.9475	57.8162	38.6464			3.6115	2.4365	2.91225	2.38075			63.221	27.512	32.405	33.288			68.632	30.403	39.979	34.656			40.271	28.119	28.624	25.869
2.57475	1.63075	5.37	2.566			61.6951	40.0259	48.6843	30.7281			2.6315	3.346	4.57767	2.01725			38.458	30.404	34.968	26.1			43.276	34.499	40.367	29.245			29.901	29.457	23.032	24.867
3.86725	1.34375	5.05753	4.0925			55.2102	31.5043	42.9541	29.8986			3.78025	3.94375		3.8435			45.139	32.215	32.139	23.114			51.79	38.668	39.541	26.118			34.4	29.918	25.916	21.866
4.6365	2.17875	5.661	3.882			86.9368	34.4252	39.9113	44.5323			6.1755			4.71725			40.866			30.038			46.486			34.151			34.819			27.761
5.66125		5.0195	4.594			77.4452		51.428	41.0163						3.14
3.282		2.4235	3.108			60.0987		50.9988	37.599
4.798		3.93075	3.06775			49.3846		47.0227	47.3721
2.83175		2.7275	2.34465			39.6891		44.702	40.6164
		5.42675
Fig. 4g																				Fig. 4k																				Fig. 4m
sIPSC amplitudes, WT					sIPSC amplitudes, Nlgn2 KO					sIPSC amplitudes, MDGA1 KO					sIPSC amplitudes, Nlgn2/MDGA1 dKO					mIPSC amplitudes, WT					mIPSC amplitudes, Nlgn2 KO					mIPSC amplitudes, MDGA1 KO					mIPSC amplitudes, Nlgn2/MDGA1 dKO					mIPSC rise times, WT					mIPSC rise times, Nlgn2 KO
bin (A)		midpoint (A)	probability		bin (A)		midpoint (A)	probability		bin (A)		midpoint (A)	probability		bin (A)		midpoint (A)	probability		bin (A)		midpoint (A)	probability		bin (A)		midpoint (A)	probability		bin (A)		midpoint (A)	probability		bin (A)		midpoint (A)	probability		bin (s)		midpoint (s)	probability		bin (s)		midpoint (s)	probability
0	2.5e-12	-1.25e-12	0		0	2.5e-12	-1.25e-12	0		0	2.5e-12	-1.25e-12	0		0	2.5e-12	-1.25e-12	0		0	2.5e-12	-1.25e-12	0		0	2.5e-12	-1.25e-12	0		0	2.5e-12	-1.25e-12	0		0	2.5e-12	-1.25e-12	0		0	1e-05	5e-06	0		0	1e-05	5e-06	0
2.5e-12	5e-12	-3.75e-12	0		2.5e-12	5e-12	-3.75e-12	0		2.5e-12	5e-12	-3.75e-12	0		2.5e-12	5e-12	-3.75e-12	0		2.5e-12	5e-12	-3.75e-12	0		2.5e-12	5e-12	-3.75e-12	0		2.5e-12	5e-12	-3.75e-12	0		2.5e-12	5e-12	-3.75e-12	0		1e-05	2e-05	1.5e-05	0		1e-05	2e-05	1.5e-05	0
5e-12	7.5e-12	-6.25e-12	9.77415e-05		5e-12	7.5e-12	-6.25e-12	4.21727e-05		5e-12	7.5e-12	-6.25e-12	0		5e-12	7.5e-12	-6.25e-12	0		5e-12	7.5e-12	-6.25e-12	3.367e-05		5e-12	7.5e-12	-6.25e-12	0.000130282		5e-12	7.5e-12	-6.25e-12	8.85184e-05		5e-12	7.5e-12	-6.25e-12	0.000150871		2e-05	3e-05	2.5e-05	0		2e-05	3e-05	2.5e-05	0
7.5e-12	1e-11	-8.75e-12	0.00262522		7.5e-12	1e-11	-8.75e-12	0.00623852		7.5e-12	1e-11	-8.75e-12	0.00150262		7.5e-12	1e-11	-8.75e-12	0.00219341		7.5e-12	1e-11	-8.75e-12	0.00244972		7.5e-12	1e-11	-8.75e-12	0.00537388		7.5e-12	1e-11	-8.75e-12	0.00452522		7.5e-12	1e-11	-8.75e-12	0.00732018		3e-05	4e-05	3.5e-05	0		3e-05	4e-05	3.5e-05	0
1e-11	1.25e-11	-1.125e-11	0.0126418		1e-11	1.25e-11	-1.125e-11	0.0309608		1e-11	1.25e-11	-1.125e-11	0.0108736		1e-11	1.25e-11	-1.125e-11	0.0182683		1e-11	1.25e-11	-1.125e-11	0.0174666		1e-11	1.25e-11	-1.125e-11	0.0345308		1e-11	1.25e-11	-1.125e-11	0.027011		1e-11	1.25e-11	-1.125e-11	0.0363766		4e-05	5e-05	4.5e-05	0		4e-05	5e-05	4.5e-05	0
1.25e-11	1.5e-11	-1.375e-11	0.0270523		1.25e-11	1.5e-11	-1.375e-11	0.0671936		1.25e-11	1.5e-11	-1.375e-11	0.0279761		1.25e-11	1.5e-11	-1.375e-11	0.0429841		1.25e-11	1.5e-11	-1.375e-11	0.0366672		1.25e-11	1.5e-11	-1.375e-11	0.074038		1.25e-11	1.5e-11	-1.375e-11	0.0526773		1.25e-11	1.5e-11	-1.375e-11	0.0731657		5e-05	6e-05	5.5e-05	0		5e-05	6e-05	5.5e-05	0
1.5e-11	1.75e-11	-1.625e-11	0.0411518		1.5e-11	1.75e-11	-1.625e-11	0.0894817		1.5e-11	1.75e-11	-1.625e-11	0.0451136		1.5e-11	1.75e-11	-1.625e-11	0.0652074		1.5e-11	1.75e-11	-1.625e-11	0.0524821		1.5e-11	1.75e-11	-1.625e-11	0.0956144		1.5e-11	1.75e-11	-1.625e-11	0.0618972		1.5e-11	1.75e-11	-1.625e-11	0.0953944		6e-05	7e-05	6.5e-05	0		6e-05	7e-05	6.5e-05	0
1.75e-11	2e-11	-1.875e-11	0.0501123		1.75e-11	2e-11	-1.875e-11	0.0879057		1.75e-11	2e-11	-1.875e-11	0.05123		1.75e-11	2e-11	-1.875e-11	0.0733734		1.75e-11	2e-11	-1.875e-11	0.0562733		1.75e-11	2e-11	-1.875e-11	0.0983649		1.75e-11	2e-11	-1.875e-11	0.0690696		1.75e-11	2e-11	-1.875e-11	0.0949811		7e-05	8e-05	7.5e-05	0		7e-05	8e-05	7.5e-05	0
2e-11	2.25e-11	-2.125e-11	0.0537828		2e-11	2.25e-11	-2.125e-11	0.0905551		2e-11	2.25e-11	-2.125e-11	0.0549797		2e-11	2.25e-11	-2.125e-11	0.0761899		2e-11	2.25e-11	-2.125e-11	0.0588904		2e-11	2.25e-11	-2.125e-11	0.090365		2e-11	2.25e-11	-2.125e-11	0.0675998		2e-11	2.25e-11	-2.125e-11	0.0906783		8e-05	9e-05	8.5e-05	0		8e-05	9e-05	8.5e-05	0
2.25e-11	2.5e-11	-2.375e-11	0.053543		2.25e-11	2.5e-11	-2.375e-11	0.0812224		2.25e-11	2.5e-11	-2.375e-11	0.0557295		2.25e-11	2.5e-11	-2.375e-11	0.0737186		2.25e-11	2.5e-11	-2.375e-11	0.0575725		2.25e-11	2.5e-11	-2.375e-11	0.0881996		2.25e-11	2.5e-11	-2.375e-11	0.064097		2.25e-11	2.5e-11	-2.375e-11	0.0855439		9e-05	0.0001	9.5e-05	0		9e-05	0.0001	9.5e-05	0
2.5e-11	2.75e-11	-2.625e-11	0.0533212		2.5e-11	2.75e-11	-2.625e-11	0.0735945		2.5e-11	2.75e-11	-2.625e-11	0.0505893		2.5e-11	2.75e-11	-2.625e-11	0.0650917		2.5e-11	2.75e-11	-2.625e-11	0.0521799		2.5e-11	2.75e-11	-2.625e-11	0.0763056		2.5e-11	2.75e-11	-2.625e-11	0.0625834		2.5e-11	2.75e-11	-2.625e-11	0.0734605		0.0001	0.00011	0.000105	0		0.0001	0.00011	0.000105	0
2.75e-11	3e-11	-2.875e-11	0.0491364		2.75e-11	3e-11	-2.875e-11	0.0618613		2.75e-11	3e-11	-2.875e-11	0.0525769		2.75e-11	3e-11	-2.875e-11	0.0611762		2.75e-11	3e-11	-2.875e-11	0.0513977		2.75e-11	3e-11	-2.875e-11	0.0642735		2.75e-11	3e-11	-2.875e-11	0.0564851		2.75e-11	3e-11	-2.875e-11	0.0630801		0.00011	0.00012	0.000115	0		0.00011	0.00012	0.000115	0
3e-11	3.25e-11	-3.125e-11	0.0462422		3e-11	3.25e-11	-3.125e-11	0.0515167		3e-11	3.25e-11	-3.125e-11	0.0471075		3e-11	3.25e-11	-3.125e-11	0.0548953		3e-11	3.25e-11	-3.125e-11	0.0464604		3e-11	3.25e-11	-3.125e-11	0.0561483		3e-11	3.25e-11	-3.125e-11	0.0549172		3e-11	3.25e-11	-3.125e-11	0.0539221		0.00012	0.00013	0.000125	0		0.00012	0.00013	0.000125	0
3.25e-11	3.5e-11	-3.375e-11	0.0414302		3.25e-11	3.5e-11	-3.375e-11	0.0443667		3.25e-11	3.5e-11	-3.375e-11	0.0454808		3.25e-11	3.5e-11	-3.375e-11	0.0489414		3.25e-11	3.5e-11	-3.375e-11	0.0424557		3.25e-11	3.5e-11	-3.375e-11	0.0481883		3.25e-11	3.5e-11	-3.375e-11	0.0460068		3.25e-11	3.5e-11	-3.375e-11	0.0492143		0.00013	0.00014	0.000135	0		0.00013	0.00014	0.000135	0
3.5e-11	3.75e-11	-3.625e-11	0.0375508		3.5e-11	3.75e-11	-3.625e-11	0.0386028		3.5e-11	3.75e-11	-3.625e-11	0.0414263		3.5e-11	3.75e-11	-3.625e-11	0.0450832		3.5e-11	3.75e-11	-3.625e-11	0.0411022		3.5e-11	3.75e-11	-3.625e-11	0.041087		3.5e-11	3.75e-11	-3.625e-11	0.0442199		3.5e-11	3.75e-11	-3.625e-11	0.0385244		0.00014	0.00015	0.000145	0		0.00014	0.00015	0.000145	0
3.75e-11	4e-11	-3.875e-11	0.0370972		3.75e-11	4e-11	-3.875e-11	0.0348054		3.75e-11	4e-11	-3.875e-11	0.0391629		3.75e-11	4e-11	-3.875e-11	0.038859		3.75e-11	4e-11	-3.875e-11	0.0373056		3.75e-11	4e-11	-3.875e-11	0.0350616		3.75e-11	4e-11	-3.875e-11	0.0401522		3.75e-11	4e-11	-3.875e-11	0.0352155		0.00015	0.00016	0.000155	0		0.00015	0.00016	0.000155	0
4e-11	4.25e-11	-4.125e-11	0.0340505		4e-11	4.25e-11	-4.125e-11	0.0279526		4e-11	4.25e-11	-4.125e-11	0.036665		4e-11	4.25e-11	-4.125e-11	0.033732		4e-11	4.25e-11	-4.125e-11	0.03721		4e-11	4.25e-11	-4.125e-11	0.0310162		4e-11	4.25e-11	-4.125e-11	0.0388947		4e-11	4.25e-11	-4.125e-11	0.0304995		0.00016	0.00017	0.000165	0		0.00016	0.00017	0.000165	5.2367e-05
4.25e-11	4.5e-11	-4.375e-11	0.0318903		4.25e-11	4.5e-11	-4.375e-11	0.0262584		4.25e-11	4.5e-11	-4.375e-11	0.0345418		4.25e-11	4.5e-11	-4.375e-11	0.0316832		4.25e-11	4.5e-11	-4.375e-11	0.0342255		4.25e-11	4.5e-11	-4.375e-11	0.0259021		4.25e-11	4.5e-11	-4.375e-11	0.0338907		4.25e-11	4.5e-11	-4.375e-11	0.0262589		0.00017	0.00018	0.000175	2.73336e-05		0.00017	0.00018	0.000175	5.77901e-05
4.5e-11	4.75e-11	-4.625e-11	0.0289156		4.5e-11	4.75e-11	-4.625e-11	0.0226554		4.5e-11	4.75e-11	-4.625e-11	0.0309132		4.5e-11	4.75e-11	-4.625e-11	0.0279552		4.5e-11	4.75e-11	-4.625e-11	0.0301146		4.5e-11	4.75e-11	-4.625e-11	0.0204264		4.5e-11	4.75e-11	-4.625e-11	0.0288093		4.5e-11	4.75e-11	-4.625e-11	0.0197834		0.00018	0.00019	0.000185	0.000115221		0.00018	0.00019	0.000185	0.000350893
4.75e-11	5e-11	-4.875e-11	0.0257788		4.75e-11	5e-11	-4.875e-11	0.0180173		4.75e-11	5e-11	-4.875e-11	0.027035		4.75e-11	5e-11	-4.875e-11	0.024696		4.75e-11	5e-11	-4.875e-11	0.0294939		4.75e-11	5e-11	-4.875e-11	0.0175799		4.75e-11	5e-11	-4.875e-11	0.0295535		4.75e-11	5e-11	-4.875e-11	0.0191949		0.00019	0.0002	0.000195	0.000355822		0.00019	0.0002	0.000195	0.000699789
5e-11	5.25e-11	-5.125e-11	0.0244935		5e-11	5.25e-11	-5.125e-11	0.0154522		5e-11	5.25e-11	-5.125e-11	0.0273685		5e-11	5.25e-11	-5.125e-11	0.0204494		5e-11	5.25e-11	-5.125e-11	0.0256443		5e-11	5.25e-11	-5.125e-11	0.0154815		5e-11	5.25e-11	-5.125e-11	0.0260361		5e-11	5.25e-11	-5.125e-11	0.0141175		0.0002	0.00021	0.000205	0.000637997		0.0002	0.00021	0.000205	0.0011627
5.25e-11	5.5e-11	-5.375e-11	0.0215987		5.25e-11	5.5e-11	-5.375e-11	0.0147761		5.25e-11	5.5e-11	-5.375e-11	0.0253252		5.25e-11	5.5e-11	-5.375e-11	0.0203963		5.25e-11	5.5e-11	-5.375e-11	0.0239781		5.25e-11	5.5e-11	-5.375e-11	0.0122951		5.25e-11	5.5e-11	-5.375e-11	0.0201662		5.25e-11	5.5e-11	-5.375e-11	0.0142738		0.00021	0.00022	0.000215	0.00125395		0.00021	0.00022	0.000215	0.00187371
5.5e-11	5.75e-11	-5.625e-11	0.0225198		5.5e-11	5.75e-11	-5.625e-11	0.011039		5.5e-11	5.75e-11	-5.625e-11	0.0234669		5.5e-11	5.75e-11	-5.625e-11	0.016894		5.5e-11	5.75e-11	-5.625e-11	0.0224091		5.5e-11	5.75e-11	-5.625e-11	0.0113449		5.5e-11	5.75e-11	-5.625e-11	0.0204101		5.5e-11	5.75e-11	-5.625e-11	0.0123624		0.00022	0.00023	0.000225	0.00262998		0.00022	0.00023	0.000225	0.00279992
5.75e-11	6e-11	-5.875e-11	0.0197874		5.75e-11	6e-11	-5.875e-11	0.00899891		5.75e-11	6e-11	-5.875e-11	0.0207145		5.75e-11	6e-11	-5.875e-11	0.0161274		5.75e-11	6e-11	-5.875e-11	0.0201537		5.75e-11	6e-11	-5.875e-11	0.00885173		5.75e-11	6e-11	-5.875e-11	0.0169358		5.75e-11	6e-11	-5.875e-11	0.0089894		0.00023	0.00024	0.000235	0.00455239		0.00023	0.00024	0.000235	0.00451385
6e-11	6.25e-11	-6.125e-11	0.0180783		6e-11	6.25e-11	-6.125e-11	0.00979572		6e-11	6.25e-11	-6.125e-11	0.019316		6e-11	6.25e-11	-6.125e-11	0.0136333		6e-11	6.25e-11	-6.125e-11	0.0170431		6e-11	6.25e-11	-6.125e-11	0.00685828		6e-11	6.25e-11	-6.125e-11	0.015107		6e-11	6.25e-11	-6.125e-11	0.00809195		0.00024	0.00025	0.000245	0.0061561		0.00024	0.00025	0.000245	0.00622322
6.25e-11	6.5e-11	-6.375e-11	0.0167894		6.25e-11	6.5e-11	-6.375e-11	0.00840339		6.25e-11	6.5e-11	-6.375e-11	0.0183913		6.25e-11	6.5e-11	-6.375e-11	0.0116072		6.25e-11	6.5e-11	-6.375e-11	0.018428		6.25e-11	6.5e-11	-6.375e-11	0.0074055		6.25e-11	6.5e-11	-6.375e-11	0.0136887		6.25e-11	6.5e-11	-6.375e-11	0.00653757		0.00025	0.00026	0.000255	0.00880209		0.00025	0.00026	0.000255	0.00917263
6.5e-11	6.75e-11	-6.625e-11	0.0155595		6.5e-11	6.75e-11	-6.625e-11	0.00607379		6.5e-11	6.75e-11	-6.625e-11	0.0157536		6.5e-11	6.75e-11	-6.625e-11	0.0106945		6.5e-11	6.75e-11	-6.625e-11	0.0138067		6.5e-11	6.75e-11	-6.625e-11	0.00510453		6.5e-11	6.75e-11	-6.625e-11	0.0122337		6.5e-11	6.75e-11	-6.625e-11	0.00587536		0.00026	0.00027	0.000265	0.0135982		0.00026	0.00027	0.000265	0.0138046
6.75e-11	7e-11	-6.875e-11	0.0143906		6.75e-11	7e-11	-6.875e-11	0.00610963		6.75e-11	7e-11	-6.875e-11	0.0152977		6.75e-11	7e-11	-6.875e-11	0.00916268		6.75e-11	7e-11	-6.875e-11	0.0153997		6.75e-11	7e-11	-6.875e-11	0.0045926		6.75e-11	7e-11	-6.875e-11	0.0109333		6.75e-11	7e-11	-6.875e-11	0.00490635		0.00027	0.00028	0.000275	0.0192098		0.00027	0.00028	0.000275	0.0176424
7e-11	7.25e-11	-7.125e-11	0.0139937		7e-11	7.25e-11	-7.125e-11	0.00543891		7e-11	7.25e-11	-7.125e-11	0.0143481		7e-11	7.25e-11	-7.125e-11	0.00835739		7e-11	7.25e-11	-7.125e-11	0.0137655		7e-11	7.25e-11	-7.125e-11	0.0025515		7e-11	7.25e-11	-7.125e-11	0.011538		7e-11	7.25e-11	-7.125e-11	0.00425618		0.00028	0.00029	0.000285	0.0270503		0.00028	0.00029	0.000285	0.0191254
7.25e-11	7.5e-11	-7.375e-11	0.0123761		7.25e-11	7.5e-11	-7.375e-11	0.00464733		7.25e-11	7.5e-11	-7.375e-11	0.0127427		7.25e-11	7.5e-11	-7.375e-11	0.00728857		7.25e-11	7.5e-11	-7.375e-11	0.0126417		7.25e-11	7.5e-11	-7.375e-11	0.00285765		7.25e-11	7.5e-11	-7.375e-11	0.0093697		7.25e-11	7.5e-11	-7.375e-11	0.00312204		0.00029	0.0003	0.000295	0.0347786		0.00029	0.0003	0.000295	0.0242962
7.5e-11	7.75e-11	-7.625e-11	0.0121043		7.5e-11	7.75e-11	-7.625e-11	0.00402216		7.5e-11	7.75e-11	-7.625e-11	0.0105255		7.5e-11	7.75e-11	-7.625e-11	0.00679932		7.5e-11	7.75e-11	-7.625e-11	0.0111328		7.5e-11	7.75e-11	-7.625e-11	0.0023632		7.5e-11	7.75e-11	-7.625e-11	0.00783638		7.5e-11	7.75e-11	-7.625e-11	0.00328112		0.0003	0.00031	0.000305	0.0424035		0.0003	0.00031	0.000305	0.0299265
7.75e-11	8e-11	-7.875e-11	0.0110569		7.75e-11	8e-11	-7.875e-11	0.0033602		7.75e-11	8e-11	-7.875e-11	0.0104216		7.75e-11	8e-11	-7.875e-11	0.00563384		7.75e-11	8e-11	-7.875e-11	0.0106127		7.75e-11	8e-11	-7.875e-11	0.0028866		7.75e-11	8e-11	-7.875e-11	0.00637329		7.75e-11	8e-11	-7.875e-11	0.00264874		0.00031	0.00032	0.000315	0.0488785		0.00031	0.00032	0.000315	0.0343254
8e-11	8.25e-11	-8.125e-11	0.0109247		8e-11	8.25e-11	-8.125e-11	0.00337748		8e-11	8.25e-11	-8.125e-11	0.0102852		8e-11	8.25e-11	-8.125e-11	0.00518051		8e-11	8.25e-11	-8.125e-11	0.00903854		8e-11	8.25e-11	-8.125e-11	0.00178631		8e-11	8.25e-11	-8.125e-11	0.00500512		8e-11	8.25e-11	-8.125e-11	0.00225732		0.00032	0.00033	0.000325	0.0510669		0.00032	0.00033	0.000325	0.036008
8.25e-11	8.5e-11	-8.375e-11	0.0090766		8.25e-11	8.5e-11	-8.375e-11	0.00280874		8.25e-11	8.5e-11	-8.375e-11	0.00874811		8.25e-11	8.5e-11	-8.375e-11	0.00531834		8.25e-11	8.5e-11	-8.375e-11	0.00867314		8.25e-11	8.5e-11	-8.375e-11	0.00136952		8.25e-11	8.5e-11	-8.375e-11	0.00552606		8.25e-11	8.5e-11	-8.375e-11	0.00166462		0.00033	0.00034	0.000335	0.0496749		0.00033	0.00034	0.000335	0.0402413
8.5e-11	8.75e-11	-8.625e-11	0.00946577		8.5e-11	8.75e-11	-8.625e-11	0.00388311		8.5e-11	8.75e-11	-8.625e-11	0.00939065		8.5e-11	8.75e-11	-8.625e-11	0.00436196		8.5e-11	8.75e-11	-8.625e-11	0.0079313		8.5e-11	8.75e-11	-8.625e-11	0.000865027		8.5e-11	8.75e-11	-8.625e-11	0.00390439		8.5e-11	8.75e-11	-8.625e-11	0.00207967		0.00034	0.00035	0.000345	0.0509972		0.00034	0.00035	0.000345	0.036411
8.75e-11	9e-11	-8.875e-11	0.0085022		8.75e-11	9e-11	-8.875e-11	0.00272026		8.75e-11	9e-11	-8.875e-11	0.00748535		8.75e-11	9e-11	-8.875e-11	0.00301268		8.75e-11	9e-11	-8.875e-11	0.00716214		8.75e-11	9e-11	-8.875e-11	0.000745045		8.75e-11	9e-11	-8.875e-11	0.00416136		8.75e-11	9e-11	-8.875e-11	0.0011204		0.00035	0.00036	0.000355	0.0541102		0.00035	0.00036	0.000355	0.0406346
9e-11	9.25e-11	-9.125e-11	0.00780558		9e-11	9.25e-11	-9.125e-11	0.00238455		9e-11	9.25e-11	-9.125e-11	0.00740402		9e-11	9.25e-11	-9.125e-11	0.00353781		9e-11	9.25e-11	-9.125e-11	0.00653582		9e-11	9.25e-11	-9.125e-11	0.000827764		9e-11	9.25e-11	-9.125e-11	0.00393755		9e-11	9.25e-11	-9.125e-11	0.00153609		0.00036	0.00037	0.000365	0.048822		0.00036	0.00037	0.000365	0.0352741
9.25e-11	9.5e-11	-9.375e-11	0.00766855		9.25e-11	9.5e-11	-9.375e-11	0.00213068		9.25e-11	9.5e-11	-9.375e-11	0.00657461		9.25e-11	9.5e-11	-9.375e-11	0.00334879		9.25e-11	9.5e-11	-9.375e-11	0.00682088		9.25e-11	9.5e-11	-9.375e-11	0.000737067		9.25e-11	9.5e-11	-9.375e-11	0.00293693		9.25e-11	9.5e-11	-9.375e-11	0.00112374		0.00037	0.00038	0.000375	0.0468965		0.00037	0.00038	0.000375	0.0368682
9.5e-11	9.75e-11	-9.625e-11	0.0061395		9.5e-11	9.75e-11	-9.625e-11	0.00191565		9.5e-11	9.75e-11	-9.625e-11	0.00548212		9.5e-11	9.75e-11	-9.625e-11	0.00247571		9.5e-11	9.75e-11	-9.625e-11	0.00547737		9.5e-11	9.75e-11	-9.625e-11	0.000766408		9.5e-11	9.75e-11	-9.625e-11	0.00237748		9.5e-11	9.75e-11	-9.625e-11	0.000435797		0.00038	0.00039	0.000385	0.039939		0.00038	0.00039	0.000385	0.0345179
9.75e-11	1e-10	-9.875e-11	0.00697418		9.75e-11	1e-10	-9.875e-11	0.00186526		9.75e-11	1e-10	-9.875e-11	0.00619276		9.75e-11	1e-10	-9.875e-11	0.00316688		9.75e-11	1e-10	-9.875e-11	0.00504914		9.75e-11	1e-10	-9.875e-11	0.000877789		9.75e-11	1e-10	-9.875e-11	0.00254562		9.75e-11	1e-10	-9.875e-11	0.00106631		0.00039	0.0004	0.000395	0.0355529		0.00039	0.0004	0.000395	0.03802
1e-10	1.025e-10	-1.0125e-10	0.00579726		1e-10	1.025e-10	-1.0125e-10	0.00143897		1e-10	1.025e-10	-1.0125e-10	0.00497205		1e-10	1.025e-10	-1.0125e-10	0.00253959		1e-10	1.025e-10	-1.0125e-10	0.00477023		1e-10	1.025e-10	-1.0125e-10	0.000571555		1e-10	1.025e-10	-1.0125e-10	0.00193532		1e-10	1.025e-10	-1.0125e-10	0.000704246		0.0004	0.00041	0.000405	0.0327854		0.0004	0.00041	0.000405	0.0346354
1.025e-10	1.05e-10	-1.0375e-10	0.00556827		1.025e-10	1.05e-10	-1.0375e-10	0.00196026		1.025e-10	1.05e-10	-1.0375e-10	0.00498703		1.025e-10	1.05e-10	-1.0375e-10	0.00199962		1.025e-10	1.05e-10	-1.0375e-10	0.00434809		1.025e-10	1.05e-10	-1.0375e-10	0.000778472		1.025e-10	1.05e-10	-1.0375e-10	0.00189081		1.025e-10	1.05e-10	-1.0375e-10	0.000467956		0.00041	0.00042	0.000415	0.0286635		0.00041	0.00042	0.000415	0.0305891
1.05e-10	1.075e-10	-1.0625e-10	0.00488967		1.05e-10	1.075e-10	-1.0625e-10	0.00130678		1.05e-10	1.075e-10	-1.0625e-10	0.00396815		1.05e-10	1.075e-10	-1.0625e-10	0.00224885		1.05e-10	1.075e-10	-1.0625e-10	0.00353026		1.05e-10	1.075e-10	-1.0625e-10	0.000775183		1.05e-10	1.075e-10	-1.0625e-10	0.00145342		1.05e-10	1.075e-10	-1.0625e-10	0.000631184		0.00042	0.00043	0.000425	0.0280322		0.00042	0.00043	0.000425	0.0284048
1.075e-10	1.1e-10	-1.0875e-10	0.00557999		1.075e-10	1.1e-10	-1.0875e-10	0.00113908		1.075e-10	1.1e-10	-1.0875e-10	0.00403771		1.075e-10	1.1e-10	-1.0875e-10	0.00179141		1.075e-10	1.1e-10	-1.0875e-10	0.00359066		1.075e-10	1.1e-10	-1.0875e-10	0.000503515		1.075e-10	1.1e-10	-1.0875e-10	0.00160197		1.075e-10	1.1e-10	-1.0875e-10	0.000381598		0.00043	0.00044	0.000435	0.0253207		0.00043	0.00044	0.000435	0.027718
1.1e-10	1.125e-10	-1.1125e-10	0.0042805		1.1e-10	1.125e-10	-1.1125e-10	0.00105016		1.1e-10	1.125e-10	-1.1125e-10	0.00339584		1.1e-10	1.125e-10	-1.1125e-10	0.00202691		1.1e-10	1.125e-10	-1.1125e-10	0.0036964		1.1e-10	1.125e-10	-1.1125e-10	0.000335388		1.1e-10	1.125e-10	-1.1125e-10	0.00100832		1.1e-10	1.125e-10	-1.1125e-10	0.000406007		0.00044	0.00045	0.000445	0.0227172		0.00044	0.00045	0.000445	0.025404
1.125e-10	1.15e-10	-1.1375e-10	0.00437086		1.125e-10	1.15e-10	-1.1375e-10	0.00127192		1.125e-10	1.15e-10	-1.1375e-10	0.00346104		1.125e-10	1.15e-10	-1.1375e-10	0.00142489		1.125e-10	1.15e-10	-1.1375e-10	0.00300241		1.125e-10	1.15e-10	-1.1375e-10	0.000528744		1.125e-10	1.15e-10	-1.1375e-10	0.00100673		1.125e-10	1.15e-10	-1.1375e-10	0.00033884		0.00045	0.00046	0.000455	0.0181386		0.00045	0.00046	0.000455	0.0238081
1.15e-10	1.175e-10	-1.1625e-10	0.00440399		1.15e-10	1.175e-10	-1.1625e-10	0.00148242		1.15e-10	1.175e-10	-1.1625e-10	0.00314665		1.15e-10	1.175e-10	-1.1625e-10	0.00159784		1.15e-10	1.175e-10	-1.1625e-10	0.00282296		1.15e-10	1.175e-10	-1.1625e-10	0.000223632		1.15e-10	1.175e-10	-1.1625e-10	0.000888869		1.15e-10	1.175e-10	-1.1625e-10	0.000369419		0.00046	0.00047	0.000465	0.0176439		0.00046	0.00047	0.000465	0.0213839
1.175e-10	1.2e-10	-1.1875e-10	0.0045175		1.175e-10	1.2e-10	-1.1875e-10	0.00127313		1.175e-10	1.2e-10	-1.1875e-10	0.0030079		1.175e-10	1.2e-10	-1.1875e-10	0.00157204		1.175e-10	1.2e-10	-1.1875e-10	0.00247784		1.175e-10	1.2e-10	-1.1875e-10	0.000357574		1.175e-10	1.2e-10	-1.1875e-10	0.000916934		1.175e-10	1.2e-10	-1.1875e-10	0.000626348		0.00047	0.00048	0.000475	0.0174018		0.00047	0.00048	0.000475	0.019798
1.2e-10	1.225e-10	-1.2125e-10	0.00380712		1.2e-10	1.225e-10	-1.2125e-10	0.000802335		1.2e-10	1.225e-10	-1.2125e-10	0.0028924		1.2e-10	1.225e-10	-1.2125e-10	0.00118994		1.2e-10	1.225e-10	-1.2125e-10	0.00198365		1.2e-10	1.225e-10	-1.2125e-10	0.000120362		1.2e-10	1.225e-10	-1.2125e-10	0.000638207		1.2e-10	1.225e-10	-1.2125e-10	0.000142378		0.00048	0.00049	0.000485	0.0135347		0.00048	0.00049	0.000485	0.0180731
1.225e-10	1.25e-10	-1.2375e-10	0.00355599		1.225e-10	1.25e-10	-1.2375e-10	0.000595071		1.225e-10	1.25e-10	-1.2375e-10	0.00255786		1.225e-10	1.25e-10	-1.2375e-10	0.00103932		1.225e-10	1.25e-10	-1.2375e-10	0.00181749		1.225e-10	1.25e-10	-1.2375e-10	0.000186134		1.225e-10	1.25e-10	-1.2375e-10	0.00049739		1.225e-10	1.25e-10	-1.2375e-10	0.000396718		0.00049	0.0005	0.000495	0.0121823		0.00049	0.0005	0.000495	0.0187891
1.25e-10	1.275e-10	-1.2625e-10	0.00295086		1.25e-10	1.275e-10	-1.2625e-10	0.00110561		1.25e-10	1.275e-10	-1.2625e-10	0.00200562		1.25e-10	1.275e-10	-1.2625e-10	0.00125144		1.25e-10	1.275e-10	-1.2625e-10	0.00160587		1.25e-10	1.275e-10	-1.2625e-10	0.000220059		1.25e-10	1.275e-10	-1.2625e-10	0.000255241		1.25e-10	1.275e-10	-1.2625e-10	0.000243768		0.0005	0.00051	0.000505	0.0126373		0.0005	0.00051	0.000505	0.0181278
1.275e-10	1.3e-10	-1.2875e-10	0.00251767		1.275e-10	1.3e-10	-1.2875e-10	0.00098238		1.275e-10	1.3e-10	-1.2875e-10	0.00242403		1.275e-10	1.3e-10	-1.2875e-10	0.000934938		1.275e-10	1.3e-10	-1.2875e-10	0.00170863		1.275e-10	1.3e-10	-1.2875e-10	0.000236696		1.275e-10	1.3e-10	-1.2875e-10	0.000461694		1.275e-10	1.3e-10	-1.2875e-10	0.000368062		0.00051	0.00052	0.000515	0.0120176		0.00051	0.00052	0.000515	0.0156211
1.3e-10	1.325e-10	-1.3125e-10	0.00299301		1.3e-10	1.325e-10	-1.3125e-10	0.000569593		1.3e-10	1.325e-10	-1.3125e-10	0.00159871		1.3e-10	1.325e-10	-1.3125e-10	0.00147719		1.3e-10	1.325e-10	-1.3125e-10	0.00126552		1.3e-10	1.325e-10	-1.3125e-10	0.000231438		1.3e-10	1.325e-10	-1.3125e-10	0.000580198		1.3e-10	1.325e-10	-1.3125e-10	0.000127019		0.00052	0.00053	0.000525	0.0103207		0.00052	0.00053	0.000525	0.0158009
1.325e-10	1.35e-10	-1.3375e-10	0.00215903		1.325e-10	1.35e-10	-1.3375e-10	0.000772113		1.325e-10	1.35e-10	-1.3375e-10	0.00179313		1.325e-10	1.35e-10	-1.3375e-10	0.00114639		1.325e-10	1.35e-10	-1.3375e-10	0.00105413		1.325e-10	1.35e-10	-1.3375e-10	5.6243e-05		1.325e-10	1.35e-10	-1.3375e-10	0.000385786		1.325e-10	1.35e-10	-1.3375e-10	0.000205879		0.00053	0.00054	0.000535	0.0107731		0.00053	0.00054	0.000535	0.0135907
1.35e-10	1.375e-10	-1.3625e-10	0.00284262		1.35e-10	1.375e-10	-1.3625e-10	0.000518667		1.35e-10	1.375e-10	-1.3625e-10	0.00137557		1.35e-10	1.375e-10	-1.3625e-10	0.000787777		1.35e-10	1.375e-10	-1.3625e-10	0.001534		1.35e-10	1.375e-10	-1.3625e-10	0.00014191		1.35e-10	1.375e-10	-1.3625e-10	0.000510433		1.35e-10	1.375e-10	-1.3625e-10	0.000187088		0.00054	0.00055	0.000545	0.00879776		0.00054	0.00055	0.000545	0.0117701
1.375e-10	1.4e-10	-1.3875e-10	0.00236321		1.375e-10	1.4e-10	-1.3875e-10	0.000472274		1.375e-10	1.4e-10	-1.3875e-10	0.00145877		1.375e-10	1.4e-10	-1.3875e-10	0.00047495		1.375e-10	1.4e-10	-1.3875e-10	0.000807731		1.375e-10	1.4e-10	-1.3875e-10	0		1.375e-10	1.4e-10	-1.3875e-10	0.00017135		1.375e-10	1.4e-10	-1.3875e-10	0.000116431		0.00055	0.00056	0.000555	0.008739		0.00055	0.00056	0.000555	0.0118015
1.4e-10	1.425e-10	-1.4125e-10	0.00262295		1.4e-10	1.425e-10	-1.4125e-10	0.00104437		1.4e-10	1.425e-10	-1.4125e-10	0.00161824		1.4e-10	1.425e-10	-1.4125e-10	0.000875413		1.4e-10	1.425e-10	-1.4125e-10	0.00133337		1.4e-10	1.425e-10	-1.4125e-10	9.08163e-05		1.4e-10	1.425e-10	-1.4125e-10	0.000316598		1.4e-10	1.425e-10	-1.4125e-10	0.000100089		0.00056	0.00057	0.000565	0.00820718		0.00056	0.00057	0.000565	0.0116449
1.425e-10	1.45e-10	-1.4375e-10	0.00200321		1.425e-10	1.45e-10	-1.4375e-10	0.00038573		1.425e-10	1.45e-10	-1.4375e-10	0.00165817		1.425e-10	1.45e-10	-1.4375e-10	0.000564722		1.425e-10	1.45e-10	-1.4375e-10	0.000839739		1.425e-10	1.45e-10	-1.4375e-10	0.000222929		1.425e-10	1.45e-10	-1.4375e-10	0.000248142		1.425e-10	1.45e-10	-1.4375e-10	7.17566e-05		0.00057	0.00058	0.000575	0.00873863		0.00057	0.00058	0.000575	0.0102916
1.45e-10	1.475e-10	-1.4625e-10	0.00191992		1.45e-10	1.475e-10	-1.4625e-10	0.000520334		1.45e-10	1.475e-10	-1.4625e-10	0.00103622		1.45e-10	1.475e-10	-1.4625e-10	0.000800953		1.45e-10	1.475e-10	-1.4625e-10	0.00102192		1.45e-10	1.475e-10	-1.4625e-10	0.000195075		1.45e-10	1.475e-10	-1.4625e-10	0.000185488		1.45e-10	1.475e-10	-1.4625e-10	0.000101747		0.00058	0.00059	0.000585	0.00620598		0.00058	0.00059	0.000585	0.00968559
1.475e-10	1.5e-10	-1.4875e-10	0.00207491		1.475e-10	1.5e-10	-1.4875e-10	0.000314813		1.475e-10	1.5e-10	-1.4875e-10	0.00120496		1.475e-10	1.5e-10	-1.4875e-10	0.000890998		1.475e-10	1.5e-10	-1.4875e-10	0.000728063		1.475e-10	1.5e-10	-1.4875e-10	7.36481e-05		1.475e-10	1.5e-10	-1.4875e-10	8.15326e-05		1.475e-10	1.5e-10	-1.4875e-10	0.000181935		0.00059	0.0006	0.000595	0.00624447		0.00059	0.0006	0.000595	0.00946639
1.5e-10	1.525e-10	-1.5125e-10	0.00117594		1.5e-10	1.525e-10	-1.5125e-10	0.000463897		1.5e-10	1.525e-10	-1.5125e-10	0.000961351		1.5e-10	1.525e-10	-1.5125e-10	0.000842353		1.5e-10	1.525e-10	-1.5125e-10	0.000725412		1.5e-10	1.525e-10	-1.5125e-10	0.000195075		1.5e-10	1.525e-10	-1.5125e-10	0.000175003		1.5e-10	1.525e-10	-1.5125e-10	0.000146336		0.0006	0.00061	0.000605	0.00699405		0.0006	0.00061	0.000605	0.00860295
1.525e-10	1.55e-10	-1.5375e-10	0.00186312		1.525e-10	1.55e-10	-1.5375e-10	0.0006131		1.525e-10	1.55e-10	-1.5375e-10	0.000952085		1.525e-10	1.55e-10	-1.5375e-10	0.00054297		1.525e-10	1.55e-10	-1.5375e-10	0.000894584		1.525e-10	1.55e-10	-1.5375e-10	0.00014057		1.525e-10	1.55e-10	-1.5375e-10	0.000162043		1.525e-10	1.55e-10	-1.5375e-10	0.000227049		0.00061	0.00062	0.000615	0.00606931		0.00061	0.00062	0.000615	0.0090757
1.55e-10	1.575e-10	-1.5625e-10	0.00153579		1.55e-10	1.575e-10	-1.5625e-10	0.000517128		1.55e-10	1.575e-10	-1.5625e-10	0.00147207		1.55e-10	1.575e-10	-1.5625e-10	0.000685535		1.55e-10	1.575e-10	-1.5625e-10	0.000868127		1.55e-10	1.575e-10	-1.5625e-10	0		1.55e-10	1.575e-10	-1.5625e-10	0.000203332		1.55e-10	1.575e-10	-1.5625e-10	5.96374e-05		0.00062	0.00063	0.000625	0.00553738		0.00062	0.00063	0.000625	0.00801497
1.575e-10	1.6e-10	-1.5875e-10	0.00137005		1.575e-10	1.6e-10	-1.5875e-10	0.000602723		1.575e-10	1.6e-10	-1.5875e-10	0.000848745		1.575e-10	1.6e-10	-1.5875e-10	0.000322732		1.575e-10	1.6e-10	-1.5875e-10	0.000679732		1.575e-10	1.6e-10	-1.5875e-10	9.90688e-05		1.575e-10	1.6e-10	-1.5875e-10	3.34672e-05		1.575e-10	1.6e-10	-1.5875e-10	0		0.00063	0.00064	0.000635	0.00506548		0.00063	0.00064	0.000635	0.00668176
1.6e-10	1.625e-10	-1.6125e-10	0.00125678		1.6e-10	1.625e-10	-1.6125e-10	0.000639355		1.6e-10	1.625e-10	-1.6125e-10	0.00090362		1.6e-10	1.625e-10	-1.6125e-10	0.000709924		1.6e-10	1.625e-10	-1.6125e-10	0.000465003		1.6e-10	1.625e-10	-1.6125e-10	6.34921e-05		1.6e-10	1.625e-10	-1.6125e-10	0.000109315		1.6e-10	1.625e-10	-1.6125e-10	0		0.00064	0.00065	0.000645	0.00445904		0.00064	0.00065	0.000645	0.00793196
1.625e-10	1.65e-10	-1.6375e-10	0.00165107		1.625e-10	1.65e-10	-1.6375e-10	0.000128619		1.625e-10	1.65e-10	-1.6375e-10	0.00086582		1.625e-10	1.65e-10	-1.6375e-10	0.000620687		1.625e-10	1.65e-10	-1.6375e-10	0.000250637		1.625e-10	1.65e-10	-1.6375e-10	0.000137627		1.625e-10	1.65e-10	-1.6375e-10	0		1.625e-10	1.65e-10	-1.6375e-10	0.000131419		0.00065	0.00066	0.000655	0.00402198		0.00065	0.00066	0.000655	0.00741453
1.65e-10	1.675e-10	-1.6625e-10	0.00122381		1.65e-10	1.675e-10	-1.6625e-10	0.000302821		1.65e-10	1.675e-10	-1.6625e-10	0.000719824		1.65e-10	1.675e-10	-1.6625e-10	0.000582016		1.65e-10	1.675e-10	-1.6625e-10	0.000627616		1.65e-10	1.675e-10	-1.6625e-10	3.45734e-05		1.65e-10	1.675e-10	-1.6625e-10	0.000174262		1.65e-10	1.675e-10	-1.6625e-10	4.46748e-05		0.00066	0.00067	0.000665	0.00387171		0.00066	0.00067	0.000665	0.00626511
1.675e-10	1.7e-10	-1.6875e-10	0.00108094		1.675e-10	1.7e-10	-1.6875e-10	0.000583338		1.675e-10	1.7e-10	-1.6875e-10	0.000823201		1.675e-10	1.7e-10	-1.6875e-10	0.00061485		1.675e-10	1.7e-10	-1.6875e-10	0.000492963		1.675e-10	1.7e-10	-1.6875e-10	0.00012024		1.675e-10	1.7e-10	-1.6875e-10	0.000114988		1.675e-10	1.7e-10	-1.6875e-10	0		0.00067	0.00068	0.000675	0.00413905		0.00067	0.00068	0.000675	0.00748234
1.7e-10	1.725e-10	-1.7125e-10	0.00122493		1.7e-10	1.725e-10	-1.7125e-10	0.000237395		1.7e-10	1.725e-10	-1.7125e-10	0.000691992		1.7e-10	1.725e-10	-1.7125e-10	0.00056873		1.7e-10	1.725e-10	-1.7125e-10	0.000481997		1.7e-10	1.725e-10	-1.7125e-10	0		1.7e-10	1.725e-10	-1.7125e-10	3.34672e-05		1.7e-10	1.725e-10	-1.7125e-10	7.06215e-05		0.00068	0.00069	0.000685	0.00407948		0.00068	0.00069	0.000685	0.00421714
1.725e-10	1.75e-10	-1.7375e-10	0.00110927		1.725e-10	1.75e-10	-1.7375e-10	0.00016295		1.725e-10	1.75e-10	-1.7375e-10	0.000641996		1.725e-10	1.75e-10	-1.7375e-10	0.000411331		1.725e-10	1.75e-10	-1.7375e-10	0.000498199		1.725e-10	1.75e-10	-1.7375e-10	9.60061e-05		1.725e-10	1.75e-10	-1.7375e-10	4.89476e-05		1.725e-10	1.75e-10	-1.7375e-10	7.06215e-05		0.00069	0.0007	0.000695	0.00340847		0.00069	0.0007	0.000695	0.00540094
1.75e-10	1.775e-10	-1.7625e-10	0.00147399		1.75e-10	1.775e-10	-1.7625e-10	0.000172561		1.75e-10	1.775e-10	-1.7625e-10	0.00055337		1.75e-10	1.775e-10	-1.7625e-10	0.000434376		1.75e-10	1.775e-10	-1.7625e-10	0.000413609		1.75e-10	1.775e-10	-1.7625e-10	3.90747e-05		1.75e-10	1.775e-10	-1.7625e-10	4.57561e-05		1.75e-10	1.775e-10	-1.7625e-10	0		0.0007	0.00071	0.000705	0.00372326		0.0007	0.00071	0.000705	0.00637998
1.775e-10	1.8e-10	-1.7875e-10	0.00100973		1.775e-10	1.8e-10	-1.7875e-10	0.000269112		1.775e-10	1.8e-10	-1.7875e-10	0.000649599		1.775e-10	1.8e-10	-1.7875e-10	0.000367874		1.775e-10	1.8e-10	-1.7875e-10	0.000426098		1.775e-10	1.8e-10	-1.7875e-10	0		1.775e-10	1.8e-10	-1.7875e-10	0		1.775e-10	1.8e-10	-1.7875e-10	0		0.00071	0.00072	0.000715	0.00349331		0.00071	0.00072	0.000715	0.00546025
1.8e-10	1.825e-10	-1.8125e-10	0.00102365		1.8e-10	1.825e-10	-1.8125e-10	0		1.8e-10	1.825e-10	-1.8125e-10	0.000608826		1.8e-10	1.825e-10	-1.8125e-10	0.000336613		1.8e-10	1.825e-10	-1.8125e-10	0.000297557		1.8e-10	1.825e-10	-1.8125e-10	0		1.8e-10	1.825e-10	-1.8125e-10	0		1.8e-10	1.825e-10	-1.8125e-10	7.17566e-05		0.00072	0.00073	0.000725	0.00296295		0.00072	0.00073	0.000725	0.00429509
1.825e-10	1.85e-10	-1.8375e-10	0.000886413		1.825e-10	1.85e-10	-1.8375e-10	0.000231345		1.825e-10	1.85e-10	-1.8375e-10	0.000594119		1.825e-10	1.85e-10	-1.8375e-10	0.000384578		1.825e-10	1.85e-10	-1.8375e-10	0.000402541		1.825e-10	1.85e-10	-1.8375e-10	0		1.825e-10	1.85e-10	-1.8375e-10	3.34672e-05		1.825e-10	1.85e-10	-1.8375e-10	3.94571e-05		0.00073	0.00074	0.000735	0.00306239		0.00073	0.00074	0.000735	0.00482555
1.85e-10	1.875e-10	-1.8625e-10	0.00109793		1.85e-10	1.875e-10	-1.8625e-10	0.000198063		1.85e-10	1.875e-10	-1.8625e-10	0.000328883		1.85e-10	1.875e-10	-1.8625e-10	0.000196599		1.85e-10	1.875e-10	-1.8625e-10	0.000249962		1.85e-10	1.875e-10	-1.8625e-10	0		1.85e-10	1.875e-10	-1.8625e-10	2.31401e-05		1.85e-10	1.875e-10	-1.8625e-10	0		0.00074	0.00075	0.000745	0.00270863		0.00074	0.00075	0.000745	0.00440026
1.875e-10	1.9e-10	-1.8875e-10	0.000743761		1.875e-10	1.9e-10	-1.8875e-10	0.000350455		1.875e-10	1.9e-10	-1.8875e-10	0.000265366		1.875e-10	1.9e-10	-1.8875e-10	0.000120261		1.875e-10	1.9e-10	-1.8875e-10	8.73021e-05		1.875e-10	1.9e-10	-1.8875e-10	0		1.875e-10	1.9e-10	-1.8875e-10	0		1.875e-10	1.9e-10	-1.8875e-10	7.06215e-05		0.00075	0.00076	0.000755	0.00276886		0.00075	0.00076	0.000755	0.00339274
1.9e-10	1.925e-10	-1.9125e-10	0.000751341		1.9e-10	1.925e-10	-1.9125e-10	0.000381482		1.9e-10	1.925e-10	-1.9125e-10	0.000458491		1.9e-10	1.925e-10	-1.9125e-10	0.000280475		1.9e-10	1.925e-10	-1.9125e-10	8.73021e-05		1.9e-10	1.925e-10	-1.9125e-10	0		1.9e-10	1.925e-10	-1.9125e-10	0		1.9e-10	1.925e-10	-1.9125e-10	0		0.00076	0.00077	0.000765	0.00238578		0.00076	0.00077	0.000765	0.0045576
1.925e-10	1.95e-10	-1.9375e-10	0.000824116		1.925e-10	1.95e-10	-1.9375e-10	0.000198063		1.925e-10	1.95e-10	-1.9375e-10	0.00046936		1.925e-10	1.95e-10	-1.9375e-10	0.000268879		1.925e-10	1.95e-10	-1.9375e-10	0.000331236		1.925e-10	1.95e-10	-1.9375e-10	0		1.925e-10	1.95e-10	-1.9375e-10	0.000113823		1.925e-10	1.95e-10	-1.9375e-10	5.96374e-05		0.00077	0.00078	0.000775	0.00273584		0.00077	0.00078	0.000775	0.00367279
1.95e-10	1.975e-10	-1.9625e-10	0.000861476		1.95e-10	1.975e-10	-1.9625e-10	0.000245675		1.95e-10	1.975e-10	-1.9625e-10	0.000296809		1.95e-10	1.975e-10	-1.9625e-10	0.000424634		1.95e-10	1.975e-10	-1.9625e-10	0.000282994		1.95e-10	1.975e-10	-1.9625e-10	0		1.95e-10	1.975e-10	-1.9625e-10	3.24412e-05		1.95e-10	1.975e-10	-1.9625e-10	0		0.00078	0.00079	0.000785	0.00217095		0.00078	0.00079	0.000785	0.00363298
1.975e-10	2e-10	-1.9875e-10	0.000492549		1.975e-10	2e-10	-1.9875e-10	0.000468448		1.975e-10	2e-10	-1.9875e-10	0.000506773		1.975e-10	2e-10	-1.9875e-10	0.000141148		1.975e-10	2e-10	-1.9875e-10	0.000323762		1.975e-10	2e-10	-1.9875e-10	0		1.975e-10	2e-10	-1.9875e-10	2.31401e-05		1.975e-10	2e-10	-1.9875e-10	0		0.00079	0.0008	0.000795	0.00236031		0.00079	0.0008	0.000795	0.00292129
2e-10	2.025e-10	-2.0125e-10	0.00066075		2e-10	2.025e-10	-2.0125e-10	0.000366403		2e-10	2.025e-10	-2.0125e-10	0.000393313		2e-10	2.025e-10	-2.0125e-10	0.000366864		2e-10	2.025e-10	-2.0125e-10	0.000196857		2e-10	2.025e-10	-2.0125e-10	0		2e-10	2.025e-10	-2.0125e-10	0		2e-10	2.025e-10	-2.0125e-10	0		0.0008	0.00081	0.000805	0.00262474		0.0008	0.00081	0.000805	0.0036239
2.025e-10	2.05e-10	-2.0375e-10	0.0010103		2.025e-10	2.05e-10	-2.0375e-10	0.000214836		2.025e-10	2.05e-10	-2.0375e-10	0.000567926		2.025e-10	2.05e-10	-2.0375e-10	9.84668e-05		2.025e-10	2.05e-10	-2.0375e-10	0.000131403		2.025e-10	2.05e-10	-2.0375e-10	0		2.025e-10	2.05e-10	-2.0375e-10	3.20051e-05		2.025e-10	2.05e-10	-2.0375e-10	3.94571e-05		0.00081	0.00082	0.000815	0.00204188		0.00081	0.00082	0.000815	0.0034562
2.05e-10	2.075e-10	-2.0625e-10	0.000835264		2.05e-10	2.075e-10	-2.0625e-10	0.000133229		2.05e-10	2.075e-10	-2.0625e-10	0.000252222		2.05e-10	2.075e-10	-2.0625e-10	0.00015506		2.05e-10	2.075e-10	-2.0625e-10	7.52391e-05		2.05e-10	2.075e-10	-2.0625e-10	0		2.05e-10	2.075e-10	-2.0625e-10	0		2.05e-10	2.075e-10	-2.0625e-10	0		0.00082	0.00083	0.000825	0.00143281		0.00082	0.00083	0.000825	0.00274354
2.075e-10	2.1e-10	-2.0875e-10	0.000256122		2.075e-10	2.1e-10	-2.0875e-10	6.4834e-05		2.075e-10	2.1e-10	-2.0875e-10	0.000156329		2.075e-10	2.1e-10	-2.0875e-10	0.000193208		2.075e-10	2.1e-10	-2.0875e-10	7.52391e-05		2.075e-10	2.1e-10	-2.0875e-10	0		2.075e-10	2.1e-10	-2.0875e-10	3.34672e-05		2.075e-10	2.1e-10	-2.0875e-10	7.06215e-05		0.00083	0.00084	0.000835	0.00174452		0.00083	0.00084	0.000835	0.00383629
2.1e-10	2.125e-10	-2.1125e-10	0.000649765		2.1e-10	2.125e-10	-2.1125e-10	0.000214836		2.1e-10	2.125e-10	-2.1125e-10	0.000414741		2.1e-10	2.125e-10	-2.1125e-10	0.000176364		2.1e-10	2.125e-10	-2.1125e-10	5.69579e-05		2.1e-10	2.125e-10	-2.1125e-10	0		2.1e-10	2.125e-10	-2.1125e-10	0		2.1e-10	2.125e-10	-2.1125e-10	0		0.00084	0.00085	0.000845	0.00179663		0.00084	0.00085	0.000845	0.0026129
2.125e-10	2.15e-10	-2.1375e-10	0.000545126		2.125e-10	2.15e-10	-2.1375e-10	9.81162e-05		2.125e-10	2.15e-10	-2.1375e-10	0.000257377		2.125e-10	2.15e-10	-2.1375e-10	0.00033934		2.125e-10	2.15e-10	-2.1375e-10	0.000155003		2.125e-10	2.15e-10	-2.1375e-10	0		2.125e-10	2.15e-10	-2.1375e-10	0		2.125e-10	2.15e-10	-2.1375e-10	0		0.00085	0.00086	0.000855	0.00127205		0.00085	0.00086	0.000855	0.0028574
2.15e-10	2.175e-10	-2.1625e-10	0.000633451		2.15e-10	2.175e-10	-2.1625e-10	7.10227e-05		2.15e-10	2.175e-10	-2.1625e-10	0.000204643		2.15e-10	2.175e-10	-2.1625e-10	7.61906e-05		2.15e-10	2.175e-10	-2.1625e-10	0.000242305		2.15e-10	2.175e-10	-2.1625e-10	0		2.15e-10	2.175e-10	-2.1625e-10	0		2.15e-10	2.175e-10	-2.1625e-10	0		0.00086	0.00087	0.000865	0.00145326		0.00086	0.00087	0.000865	0.00243611
2.175e-10	2.2e-10	-2.1875e-10	0.000795756		2.175e-10	2.2e-10	-2.1875e-10	3.51124e-05		2.175e-10	2.2e-10	-2.1875e-10	0.000245906		2.175e-10	2.2e-10	-2.1875e-10	5.74601e-05		2.175e-10	2.2e-10	-2.1875e-10	5.6164e-05		2.175e-10	2.2e-10	-2.1875e-10	0		2.175e-10	2.2e-10	-2.1875e-10	0		2.175e-10	2.2e-10	-2.1875e-10	3.94571e-05		0.00087	0.00088	0.000875	0.00168999		0.00087	0.00088	0.000875	0.0019268
2.2e-10	2.225e-10	-2.2125e-10	0.000626922		2.2e-10	2.225e-10	-2.2125e-10	0		2.2e-10	2.225e-10	-2.2125e-10	0.000256364		2.2e-10	2.225e-10	-2.2125e-10	0.00019233		2.2e-10	2.225e-10	-2.2125e-10	6.99203e-05		2.2e-10	2.225e-10	-2.2125e-10	0		2.2e-10	2.225e-10	-2.2125e-10	0		2.2e-10	2.225e-10	-2.2125e-10	7.06215e-05		0.00088	0.00089	0.000885	0.00123254		0.00088	0.00089	0.000885	0.0018519
2.225e-10	2.25e-10	-2.2375e-10	0.000418525		2.225e-10	2.25e-10	-2.2375e-10	6.4834e-05		2.225e-10	2.25e-10	-2.2375e-10	0.000240784		2.225e-10	2.25e-10	-2.2375e-10	9.73757e-05		2.225e-10	2.25e-10	-2.2375e-10	4.94193e-05		2.225e-10	2.25e-10	-2.2375e-10	0		2.225e-10	2.25e-10	-2.2375e-10	0		2.225e-10	2.25e-10	-2.2375e-10	0.000108381		0.00089	0.0009	0.000895	0.00145532		0.00089	0.0009	0.000895	0.00240122
2.25e-10	2.275e-10	-2.2625e-10	0.000310374		2.25e-10	2.275e-10	-2.2625e-10	0		2.25e-10	2.275e-10	-2.2625e-10	0.000394715		2.25e-10	2.275e-10	-2.2625e-10	0.000126657		2.25e-10	2.275e-10	-2.2625e-10	7.52391e-05		2.25e-10	2.275e-10	-2.2625e-10	0		2.25e-10	2.275e-10	-2.2625e-10	0		2.25e-10	2.275e-10	-2.2625e-10	0		0.0009	0.00091	0.000905	0.00131102		0.0009	0.00091	0.000905	0.00224952
2.275e-10	2.3e-10	-2.2875e-10	0.0005456		2.275e-10	2.3e-10	-2.2875e-10	9.81162e-05		2.275e-10	2.3e-10	-2.2875e-10	0.000130928		2.275e-10	2.3e-10	-2.2875e-10	7.46547e-05		2.275e-10	2.3e-10	-2.2875e-10	0.000260586		2.275e-10	2.3e-10	-2.2875e-10	0		2.275e-10	2.3e-10	-2.2875e-10	0		2.275e-10	2.3e-10	-2.2875e-10	0		0.00091	0.00092	0.000915	0.00156334		0.00091	0.00092	0.000915	0.00176817
2.3e-10	2.325e-10	-2.3125e-10	0.000460705		2.3e-10	2.325e-10	-2.3125e-10	0		2.3e-10	2.325e-10	-2.3125e-10	0.000505518		2.3e-10	2.325e-10	-2.3125e-10	0.000187762		2.3e-10	2.325e-10	-2.3125e-10	0		2.3e-10	2.325e-10	-2.3125e-10	0		2.3e-10	2.325e-10	-2.3125e-10	0		2.3e-10	2.325e-10	-2.3125e-10	0		0.00092	0.00093	0.000925	0.00134685		0.00092	0.00093	0.000925	0.00198555
2.325e-10	2.35e-10	-2.3375e-10	0.000370389		2.325e-10	2.35e-10	-2.3375e-10	0.000144378		2.325e-10	2.35e-10	-2.3375e-10	0.000307845		2.325e-10	2.35e-10	-2.3375e-10	3.96621e-05		2.325e-10	2.35e-10	-2.3375e-10	8.19838e-05		2.325e-10	2.35e-10	-2.3375e-10	0		2.325e-10	2.35e-10	-2.3375e-10	2.31401e-05		2.325e-10	2.35e-10	-2.3375e-10	0		0.00093	0.00094	0.000935	0.00116577		0.00093	0.00094	0.000935	0.00145621
2.35e-10	2.375e-10	-2.3625e-10	0.000368197		2.35e-10	2.375e-10	-2.3625e-10	0		2.35e-10	2.375e-10	-2.3625e-10	0.000236003		2.35e-10	2.375e-10	-2.3625e-10	6.02123e-05		2.35e-10	2.375e-10	-2.3625e-10	4.94193e-05		2.35e-10	2.375e-10	-2.3625e-10	0		2.35e-10	2.375e-10	-2.3625e-10	0		2.35e-10	2.375e-10	-2.3625e-10	0		0.00094	0.00095	0.000945	0.000898896		0.00094	0.00095	0.000945	0.00193066
2.375e-10	2.4e-10	-2.3875e-10	0.000550451		2.375e-10	2.4e-10	-2.3875e-10	0.000189394		2.375e-10	2.4e-10	-2.3875e-10	0.000182525		2.375e-10	2.4e-10	-2.3875e-10	0.000205701		2.375e-10	2.4e-10	-2.3875e-10	6.45382e-05		2.375e-10	2.4e-10	-2.3875e-10	0		2.375e-10	2.4e-10	-2.3875e-10	4.89476e-05		2.375e-10	2.4e-10	-2.3875e-10	0		0.00095	0.00096	0.000955	0.00119872		0.00095	0.00096	0.000955	0.00146061
2.4e-10	2.425e-10	-2.4125e-10	0.000278766		2.4e-10	2.425e-10	-2.4125e-10	0		2.4e-10	2.425e-10	-2.4125e-10	0.000212742		2.4e-10	2.425e-10	-2.4125e-10	0.000144147		2.4e-10	2.425e-10	-2.4125e-10	0		2.4e-10	2.425e-10	-2.4125e-10	0		2.4e-10	2.425e-10	-2.4125e-10	0		2.4e-10	2.425e-10	-2.4125e-10	0		0.00096	0.00097	0.000965	0.00103727		0.00096	0.00097	0.000965	0.00136175
2.425e-10	2.45e-10	-2.4375e-10	0.000280979		2.425e-10	2.45e-10	-2.4375e-10	9.81162e-05		2.425e-10	2.45e-10	-2.4375e-10	0.000140324		2.425e-10	2.45e-10	-2.4375e-10	0.0001767		2.425e-10	2.45e-10	-2.4375e-10	0		2.425e-10	2.45e-10	-2.4375e-10	0		2.425e-10	2.45e-10	-2.4375e-10	0		2.425e-10	2.45e-10	-2.4375e-10	0		0.00097	0.00098	0.000975	0.000762871		0.00097	0.00098	0.000975	0.00169318
2.45e-10	2.475e-10	-2.4625e-10	0.00039346		2.45e-10	2.475e-10	-2.4625e-10	0		2.45e-10	2.475e-10	-2.4625e-10	0.000265041		2.45e-10	2.475e-10	-2.4625e-10	0.000131462		2.45e-10	2.475e-10	-2.4625e-10	4.94193e-05		2.45e-10	2.475e-10	-2.4625e-10	0		2.45e-10	2.475e-10	-2.4625e-10	0		2.45e-10	2.475e-10	-2.4625e-10	0		0.00098	0.00099	0.000985	0.000554365		0.00098	0.00099	0.000985	0.00144022
2.475e-10	2.5e-10	-2.4875e-10	0.000408496		2.475e-10	2.5e-10	-2.4875e-10	0		2.475e-10	2.5e-10	-2.4875e-10	0.000283994		2.475e-10	2.5e-10	-2.4875e-10	0.000113844		2.475e-10	2.5e-10	-2.4875e-10	0		2.475e-10	2.5e-10	-2.4875e-10	5.10934e-05		2.475e-10	2.5e-10	-2.4875e-10	0		2.475e-10	2.5e-10	-2.4875e-10	0		0.00099	0.001	0.000995	0.000787643		0.00099	0.001	0.000995	0.00187559
			1					1					1					1					1					1					1					1					1					1
[truncated: 8 more columns]

## Sheet: Fig.5
Fig. 5c
PSD-95 NUMBER			vGluT1 NUMBER			PSD-95 NUMBER			vGluT1 NUMBER
Stratum pyramidale			Stratum pyramidale			Stratum radiatum			Stratum radiatum
WT	MDGA1 KO		WT	MDGA1 KO		WT	MDGA1 KO		WT	MDGA1 KO
140.95	29		142.73	118.03		153.6	46.78		130.75	92.56
89.9	80.05		106.31	154.45		117.79	82.6		149.92	73.4
65.65	104.3		159.82	100.94		40.53	159.86		96.49	126.82
90.87	79.08		33.53	227.24		90.13	110.26		57.59	165.73
122.14	47.81		120.35	140.41		107.53	92.85		109.19	114.12
90.48	79.47		37.25	223.51		90.42	109.96		56.08	167.24
Fig. 5d
PSD-95 SIZE			vGluT1 SIZE			PSD-95 SIZE			vGluT1 SIZE
Stratum pyramidale			Stratum pyramidale			Stratum radiatum			Stratum radiatum
WT	MDGA1 KO		WT	MDGA1 KO		WT	MDGA1 KO		WT	MDGA1 KO
104.43	95.24		93.86	109.39		118.08	87.58		121.08	106.73
112.81	86.85		101.33	101.91		111.03	94.63		131.44	96.36
97.88	101.79		121.59	81.66		83.36	122.3		81.32	146.49
88.66	111.01		80.5	122.75		93.87	111.79		78.35	149.46
99.65	100.02		99.65	103.59		102.38	103.27		110.74	117.07
96.57	103.09		103.07	100.18		91.29	114.37		77.07	150.74
Fig. 5h				Fig. 5i
mEPSC frequency (s-1)				mEPSC amplitude (pA)
WT	MDGA1 KO			WT	MDGA1 KO
0.121	0.1031			7.96	6.99
0.1986	0.1014			7.69	8.92
0.0869	0.1625			7.49	10.56
0.1056	0.1283			10.02	10.02
0.1027	0.1463			7.74	11.64
0.1294	0.05324			10.57	6.54
0.1493	0.2827			9.32	8.9
0.1338	0.09375			9.66	9.03
0.1297	0.124			9.63	9.43
0.1131	0.06538			9.37	9.81
0.06396	0.1028			10.16	10.91
0.112	0.1693			8.35	9.15
0.1112	0.1814			9.17	9.88
0.08503	0.1368			9.53	9.21
0.1871	0.09062			9.33	9.05
0.0789	0.1212			10.67	9.57
0.1165	0.239			8.8	10.87
0.07757	0.2303			9.91	12.12
0.07299	0.2383			10.23	8.83
0.1476	0.133			10.1	8.93
0.1237	0.1752			10.7	10.6
0.1854	0.1116			11.34	11.39
0.06633				8.9

## Sheet: Fig.6
Fig. 6d						Fig. 6e						Fig. 6f
MDGA1 Females
	Time in Center ( s )						Distance in Center (%)						Total Distance ( m )
	WT	Nlgn2 KO	MDGA1 KO	dKO			WT	Nlgn2 KO	MDGA1 KO	dKO			WT	Nlgn2 KO	MDGA1 KO	dKO
	112.8	71.6	150.7	43.4			32.7798	28.4205	32.9465	30.3713			52.267	27.174	38.608	81.056
	171.3	26.8	163.3	131.3			44.1619	15.0563	37.0824	34.8163			55.557	11.995	50.973	30.407
	132.4	76	160.1	98.8			33.2629	25.4164	40.1865	34.4066			61.498	24.555	27.554	30.862
	109.5	96.6	196.5	116.5			36.3897	29.5683	35.7536	23.7189			54.837	39.752	51.648	43.326
	147.3	101	91.9	153.8			37.7361	27.5873	26.9889	36.3592			63.202	37.278	53.458	13.875
	136.8	40.8	225.2	176.7			35.595	16.3493	44.7641	24.854			47.501	24.209	48.605	22.704
	185.6	4.5	179	88.1			43.4445	33.4178	41.8928	45.0688			34.768	5.829	22.569	52.394
	151.6	115.8	183.2	179			34.4483	28.8172	33.9714	38.8893			33.321	35.93	43.377	19.468
	125.3	77.1	266.3	145.4			28.3545	23.0239	53.4016	31.5854			33.819	26.269	53.372	73.56
		96.9	171.1				31.6449		43.6652					50.326		56.906
