# Supplementary material for: Functional Neuroligin-2-MDGA1 interactions differentially regulate synaptic GABAARs and cytosolic gephyrin aggregation
Source: Commun Biol. 2024 Sep 17;7:1157. doi: 10.1038/s42003-024-06789-z (PMC11405390; doi:10.1038/s42003-024-06789-z)
Supplement: Supplementary file 4 — Supplementary Data 2 [file 42003_2024_6789_MOESM4_ESM.xlsx]

## Sheet: Supplementary Fig.1
qRTPCR
Supplementary Fig.1g mRNA level (%WT)
WT	MDGA1 KO		WT	MDGA2 Het
74.3106	0.327475		88.3127	71.1202
71.9485	0.258851		107.623	85.7886
91.2064	1.34328		79.5479	77.0096
101.736	0.844738		139.53	82.9417
88.1234	0.31038		84.9871	141.335
50.5747
222.1
Supplementary Fig.1i mRNA level (%WT)
WT	MDGA1 KO		WT	MDGA2 Het
63.6588	143.657		85.993	33.5524
56.8555	80.9911		115.428	40.4194
125.293	63.5887		102.325	39.2666
72.4465	84.3856		120.922	53.2344
123.601	61.2476		75.3319	31.2645
105.127	114.309
153.018	126.109
WB
Supplementary Fig.1k protein level (%WT)
	WT	MDGA2 Het
	151.164	133.821
	105.062	64.7146
	66.6204	102.296
	108.6	110.556
	100.136	111.525
	68.4178	79.2141
					(a) Western blot membrane showing the total protein stain and (b) the result of the immunoblot against MDGA1 in WT and MDGA2 Het mice

## Sheet: Supplementary Fig.3
Supplementary Fig.3b					Supplementary Fig.3c
Gephyrin aggregates NUMBER					Gephyrin aggregates TOTAL AREA
WT	Nlgn2 KO	MDGA2 Het	MDGA2 Het / Nlgn2 KO		WT	Nlgn2 KO	MDGA2 Het	MDGA2 Het / Nlgn2 KO
128.35	166.74	79.3	55.81		152.31	175.45	183.88	87.06
83.37	177.1	109.31	172.84		79.47	120.9	61	248.42
170.18	160.89	101.08	45.66		135.11	290.29	81.1	227.22
94.76	149.68	108.71	75.81		93.07	182.36	120.22	60.76
73.92	111.99	105.33	158.72		72.18	195.08	101.86	207.94
104.22	111.61	134.9	143.03		101.53	110.48	99.34	168.39
77.2	160.54	126.49	178.16		87.23	118.36	161.77	204.85
52.09	161.48	68.8	212.06		47.08	210.77	132.57	266.33
119.26		72.48	153.66		132.79	187.58	67.89	152.88
96.64			171.66		99.22		79.72	197.81
Supplementary Fig.3d																																									Supplementary Fig.3e
Frequency of APs (s-1)					Frequency of APs (s-1)					Frequency of APs (s-1)					Frequency of APs (s-1)					Frequency of APs (s-1)					Frequency of APs (s-1)					Frequency of APs (s-1)					Frequency of APs (s-1)
25 pA current injection					50 pA current injection					75 pA current injection					100 pA current injection					150 pA current injection					200 pA current injection					300 pA current injection					400 pA current injection						Maximum rate of rise (mV/ms)
WT	Nlgn2 KO	MDGA2 Het	MDGA2 Het / Nlgn2 KO		WT	Nlgn2 KO	MDGA2 Het	MDGA2 Het / Nlgn2 KO		WT	Nlgn2 KO	MDGA2 Het	MDGA2 Het / Nlgn2 KO		WT	Nlgn2 KO	MDGA2 Het	MDGA2 Het / Nlgn2 KO		WT	Nlgn2 KO	MDGA2 Het	MDGA2 Het / Nlgn2 KO		WT	Nlgn2 KO	MDGA2 Het	MDGA2 Het / Nlgn2 KO		WT	Nlgn2 KO	MDGA2 Het	MDGA2 Het / Nlgn2 KO		WT	Nlgn2 KO	MDGA2 Het	MDGA2 Het / Nlgn2 KO			WT	Nlgn2 KO	MDGA2 Het	MDGA2 Het / Nlgn2 KO
0	0	0	0		0	2.5	0	6.25		2.5	7.5	2.5	7.5		8.75	6.66667	3.75	14.1667		18.75	15	6.25	22.5		27.5	17.5	15	31.25		37.5	21.25	25	40		0	25	30	42.5			706.4	606.4	507.6	662.7
0	0	0	0		7.5	0	8.75	5		12.5	0	17.5	0		10.8333	2.5	22.5	8.33333		16.25	12.5	28.75	13.75		23.75	25	37.5	22.5		31.25	27.5	45	31.25		35	36.25	50	35			811.9	620.7	705.5	541.7
0	0	2.5	0		5	3.75	0	5		10	7.5	0	7.5		15.8333	11.25	14.1667	15		22.5	16.25	21.25	22.5		27.5	22.5	33.75	30		33.75	27.5	45	36.25		37.5	0	52.5	40			545.5	699.2	853.7	590.4
0	0	0	0		10	0	0	0		5	0	7.5	5		19.1667	3.75	17.5	9.16667		26.25	11.25	22.5	16.25		32.5	21.25	31.6667	22.5		40	30	46.25	25		45	37.5	52.5	32.5			525.7	682.2	665.6	775.4
0	2.5	0	2.5		3.75	7.5	11.25	6.25		0	7.5	10	15		11.6667	20	22.5	18.75		21.25	26.25	31.25	25		30	33.75	42.5	27.5		38.75	41.25	51.25	35		45	47.5	45	42.5			717.8	506.4	703.1	665.6
0	0	0	7.5		0	2.5	0	11.25		7.5	2.5	2.5	15		10.8333	8.33333	10	22.5		20	15	18.75	28.75		31.25	21.25	31.25	38.75		42.5	25	42.5	48.75		52.5	25	52.5	55			791.5	612.4	920.1	789.1
0	0	0	5		3.75	0	0	11.25		2.5	0	0	17.5		12.5	7.5	6.66667	21.6667		17.5	10	11.25	28.75		25	23.75	18.75	32.5		32.5	35	27.5	40		37.5	47.5	32.5	40			638.7	553.9	636.9	631.4
0	0	0	0		5	5	11.25	3.75		12.5	12.5	15	7.5		10	12.5	22.5	17.5		15	20	31.25	23.75		22.5	23.75	37.5	32.5		33.75	32.5	47.5	41.25		37.5	35	55	50			620.6	748.6	710.4	699
0	0	0	0		8.75	5	5	7.5		7.5	10	10	12.5		18.3333	14.1667	14.1667	17.5		26.25	20	25	22.5		32.5	25	32.5	27.5		43.75	31.25	41.25	33.75		50	37.5	50	37.5			724.4	592.5	702	584.6
0	0	0	7.5		2.5	3.75	6.25	15		0	10	12.5	20		12.5	12.5	16.6667	24.1667		16.25	17.5	25	32.5		23.75	21.25	30	38.75		33.75	26.25	37.5	46.25		40	30	42.5	52.5			625	748.7	784.6	739.7
0	0	0	0		0	5	0	0		2.5	10	0	2.5		5	15	5.83333	6.25		15	22.5	11.25	10		23.75	27.5	22.5	20		32.5	35	33.75	22.5		42.5	40	42.5	25			564.7	792.7	663.6	481.4
0	0	0	0		2.5	2.5	0	2.5		5	5	0	7.5		12.5	12.5	2.5	10.8333		18.75	16.25	11.25	17.5		26.25	25	20	20		36.25	31.25	31.25	30		45	35	40	30			670.9	876.1	738.7	551.7
0	0	0	0		2.5	2.5	2.5	5		0	2.5	5	10		10	5.83333	7.5	14.1667		21.25	12.5	15	21.25		36.25	18.75	25	25		51.25	30	35	26.25		62.5	37.5	42.5	25			757	670.3	758.2	535.6
0	0	5	0		0	0	8.75	0		5	5	12.5	2.5		6.25	14.1667	22.5	11.6667		7.5	23.75	28.75	21.25		22.5	30	37.5	31.25		32.5	38.75	46.25	41.25		37.5	47.5	57.5	50			782.8	654.3	791.2	808.1
0		0	0		5		10	5		15		12.5	12.5		9.16667		23.3333	18.3333		18.75		31.25	25		26.25		41.25	31.25		33.75		51.25	41.25		40		57.5	50			693.9	684.6	750	753.1
0		2.5	0		8.75		7.5	5		0		17.5	10		20.8333		22.5	15.8333		30		30	22.5		38.75		41.25	30		48.75		51.25	37.5		57.5		60	45			679.8	478.1	856.5	733.1
0		5	0		0		12.5	0		0		20	0		4.16667		25.8333	10		12.5		31.25	16.25		23.75		40	26.25		36.25		51.25	35		42.5		55	42.5			663.5	706.1		548.1
0					0										6.25					11.25					21.25					33.75					45						732.2	546.4
																																									870.3
Supp.Fig.3k					Supp.Fig.3i					Supp.Fig.3o					Supp.Fig.3m
sIPSC frequency (s-1)					sIPSC amplitude (pA)					mIPSC frequency (s-1)					mIPSC amplitude (pA)
WT	Nlgn2 KO	MDGA2 Het	MDGA2 Het / Nlgn2 KO		WT	Nlgn2 KO	MDGA2 Het	MDGA2 Het / Nlgn2 KO		WT	Nlgn2 KO	MDGA2 Het	MDGA2 Het / Nlgn2 KO		WT	Nlgn2 KO	MDGA2 Het	MDGA2 Het / Nlgn2 KO
3.352	2.49175	4.29025	2.41275		32.07	26.26	35.97	34.19		3.82425	3.084	2.96775	2.48725		35.62	23.39	37.87	18.81
4.61225	3.73925	9.12825	1.07892		50.17	22.1	47.3	24.75		5.55567	3.52033	2.785	1.81125		36.92	26.45	37.38	20.47
3.67775	3.60125	6.44775	3.29075		28.815	27.94	50.68	30.98		3.948	1.76475	2.57125	1.928		28.95	23.84	32.27	21.14
3.8415	2.16625	8.32775	3.90075		33.83	33.36	35.04	29.03		4.60675	4.41725	2.13825	1.744		26.26	27.55	38.63	16.35
4.1755	4.80625	5.38475	1.2775		42.36	32.16	47.28	28.42		4.94275	0.9614	3.73325	2.61275		40.32	21.02	37.53	24.31
4.05625	2.1065	4.2135	2.29825		49.88	37.36	38.65	24.35		3.12375	1.88467	2.532	3.108		33.36	20.49	38.03	26.34
4.96375	0.663275	4.3325	2.638		36.65	41.66	34.28	28.58		3.71825	3.04	3.291	3.75875		33.48	21	26.63	24.88
7.05575	2.387	6.4965	2.62775		69.82	31.84	30.2	26.16		4.294	2.3915	5.94625	1.71575		34.59	19.65	34.88	18.2
7.15575	2.857	6.1545	2.47033		47.27	28.34	44.12	25.36		4.679	1.43075	5.04475	3.27425		30.98	22.36	34.88	19.55
6.6965	3.591	6.4135	0.775925		47.6	26.33	34.49	27.02		4.96633	1.43075	3.27375	4.1185		24.38	22.36	29.49	21.23
8.102	2.00275	4.50475	1.928		45.51	29.57	38.55	34.08		4.5555	3.88175	4.8235	2.2885		29.07	19.85	32.73	25.2
6.63075	3.1025	4.4155	2.88075		43.9	28.98	40.88	39.93		5.7105	3.85467	4.3835	2.9425		31.68	21.56	31.42	23.62
7.9505	6.06725	6.739	3.693		59.24	31.91	49.45	23.8		5.62725	3.4715	4.3365	2.19175		35.71	22.25	30.09	21.3
7.567	1.81433	4.35967	2.92525		43.51	25.12	49.53	23.6		4.15825	3.1655	2.9295	3.86875		29.64	24.47	31.97	21.8
4.4725	2.03875	6.44275	2.49133		74.86	32.1	31.23	23.85		3.41825	3.84933	3.84633	2.12775		28.75	16.8	33.76	17.18
	2.664	5.4125				37.14	51.46			3.67525		2.74775	1.78175		31.56		34.59	23.37
		7.517					39.72			3.80667			3.9115		41.21			20.91
							35.88			2.8975					30.95
										4.11575

## Sheet: Supplementary Fig.5
MDGA1-Males					Supplementary Fig.5e
	Time in Center ( s )					Distance in Center (%)					Total Distance ( m )
	WT	Nlgn2 KO	MDGA1 KO	dKO		WT	Nlgn2 KO	MDGA1 KO	dKO		WT	Nlgn2 KO	MDGA1 KO	dKO
	146.6	77.7	106.6	79.8		42.7128	29.6936	33.5297	22.0594		51.172	21.668	47.701	38.07
	136.4	137.4	194.2	95.1		25.906	23.7279	47.6156	24.1608		38.228	12.604	52.592	34.763
	124	112.3	238.9	94.7		35.1235	27.2675	41.7903	21.9576		27.567	40.307	44.965	33.51
	58.1	120.7	178.2	76.2		26.6152	31.0991	38.6673	23.7196		40.833	52.326	41.089	31.885
	117.1	161.5	181.6	118.6		34.046	37.8015	35.1334	22.5919		47.739	23.573	56.294	40.032
	204.7	103.9	249.4	91		49.0584	23.379	48.7442	29.8637		36.924	36.48	48.654	7.592
	138.6	128.5	251.3	98.1		38.1215	30.9909	44.6189	32.4985		44.373	41.255	68.536	13.354
	130.8		176.1	62		35.6636		38.3802	18.4676			42.448	68.775	27.549
				133					23.6476					43.682
														26.637
MDGA2-Males					Supplementary Fig.5g
	Time in Center ( s )					Distance in Center (%)					Total Distance ( m )
	WT	Nlgn2 KO	MDGA2 Het	MDGA2 Het / Nlgn2 KO		WT	Nlgn2 KO	MDGA2 Het	MDGA2 Het / Nlgn2 KO		WT	Nlgn2 KO	MDGA2 Het	MDGA2 Het / Nlgn2 KO
	148.5	76.1	175.3	119.9		37.211	27.5146	34.3484	25.1596		53.339	33.157	38.29	26.634
	96.8	145.2	127.3	104.8		28.9514	36.463	43.2853	21.8985		58.201	41.165	42.943	47.428
	173.2	110.9	183.1	131		36.641	25.205	36.8876	21.6013		54.106	25.61	51.884	41.729
	132.4	123.9	151.3	136.9		33.5618	28.8085	34.8084	27.215		51.073	39.221	31.906	44.402
	180.3	69.2	139.8	105.6		40.5754	24.4352	37.2438	22.4951		68.857	41.919	41.611	69.722
	166.4	66.3	157.9	165.9		35.0602	23.1501	42.4095	26.9226		48.334	29.866	57.705	57.617
	145.6	130.6	212.3	105.9		33.3234	33.7821	48.9334	32.0852		47.066	26.52	55.555	35.066
	189.2	101.1	182.5	163.7		35.6221	21.5919	42.6046	8.20431		26.506	19.813	33.235	11.238
	149.2	30.3	213	77		35.2463	16.7079	47.6155	28.0608		47.906	21.02	52.073	24.953
	143.7	77.8	117.4	97.5		35.6082	22.7317	34.9144	17.1241		47.483	35.655	48.596	39.208
	192.2	152.8	125.3	88.6		40.9183	28.7056	41.1515	14.7566		72.972	13.952	45.886	66.838
	205.7	62.8	158.2	62.3		41.8351	23.008	36.5624	14.6462		35.588	21.662		62.412
									13.9116		39.67			58.498
MDGA2-Females					Supplementary Fig.5h
	Time in Center ( s )					Distance in Center (%)					Total Distance ( m )
	WT	Nlgn2 KO	MDGA2 Het	MDGA2 Het / Nlgn2 KO		WT	Nlgn2 KO	MDGA2 Het	MDGA2 Het / Nlgn2 KO		WT	Nlgn2 KO	MDGA2 Het	MDGA2 Het / Nlgn2 KO
	158.8	60.7	158.5	136.7		42.135	18.2906	23.9416	20.1682		46.904	32.678	37.721	29.021
	114.1	49.6	217.3	70.9		27.1471	17.1905	50.9339	31.7723		51.814	23.67	56.909	39.27
	172.3	2	122.9	66.5		46.8796	0.97352	49.8632	32.374		58.535	37.797	53.38	26.617
	135.8	80.2	76.7	147.9		34.4336	25.7587	27.9994	19.9714		53.381	28.395	57.662	37.709
	185.8	31.2	150.5	56.1		43.019	9.1495	25.0088	39.5721		68.042	19.268	28.274	65.943
	147.5	22.2	150.7	74.3		38.5997	3.68487	35.3489	18.7407		47.591	43.179	41.444	39.054
	195.4	87.1	113.8	65.1		45.9436	26.4087	32.9465	23.4318		54.926	22.944	38.608	52.992
	145	79.1	145.3	161.7		36.13	30.6485	35.9771	14.0504		39.654	27.194	52.072	41.031
	146.4	151	200	118.9		36.1624	42.4432	41.1074	29.813		62.081	42.201	55.951	43.093
	178.3	87	246.5	89		29.5616	28.0941	38.6941	31.2533		61.705	47.957	39.696	29.817
	142.7	153.5		67.3		39.4665	35.3254	52.9015	13.935		45.735		47.751	30.119
	64.8	84.9				42.2815			24.9643		45.488

## Sheet: Supplementary Table 1
Avg. Cq MDGA1			Avg. Cq MDGA2			Avg. Cq GAPDH
WT	MDGA1 KO		WT	MDGA1 KO		WT	MDGA1 KO
30.7707	38.3983		30.4955	30.719		22.5019	23.8996
30.9742	38.7753		30.8155	32.3325		22.6588	24.6862
31.1281	37.8517		30.1717	30.2987		23.1549	22.3034
30.4654	37.9458		30.4569	29.9282		22.6498	22.3412
30.7452	40.0926		29.7588	31.8426		22.7224	23.7932
32.6101			31.0562	30.3672		23.7862	23.2181
31.6999			31.7391	30.9279		25.0107	23.9204
Avg. Cq MDGA1			Avg. Cq MDGA2			Avg. Cq GAPDH
WT	MDGA2 Het		WT	MDGA2 Het		WT	MDGA2 Het
31.9875	31.1113		30.5503	30.7195		23.4957	22.3071
31.0083	31.8799		29.4317	31.49		22.8018	23.3463
31.9317	31.6395		30.0929	31.1357		23.2892	22.9502
31.3632	31.6112		30.0941	30.7753		23.5313	23.0289
31.5186	30.5515		30.217	31.2524		22.9715	22.7382

## Sheet: Supplementary Table 2
Gephyrin NUMBER					Gephyrin SIZE						GABA NUMBER					GABA SIZE						VIAAT NUMBER					VIAAT SIZE
Stratum oriens					Stratum oriens						Stratum oriens					Stratum oriens						Stratum oriens					Stratum oriens
WT	Nlgn2 KO	MDGA1 KO	dKO		WT	Nlgn2 KO	MDGA1 KO	dKO			WT	Nlgn2 KO	MDGA1 KO	dKO		WT	Nlgn2 KO	MDGA1 KO	dKO			WT	Nlgn2 KO	MDGA1 KO	dKO		WT	Nlgn2 KO	MDGA1 KO	dKO
95.675	99.195	103.164	44.111		92.533	89.371	103.166	90.654			79.39	85.264	131.886	71.308		89.959	82.643	97.112	79.251			87.323	36.139	117.733	126.856		103.415	109.406	86.177	77.466
135.472	84.346	67.736	54.59		108.421	95.636	91.254	80.412			128.998	94.27	74.965	69.614		110.724	84.203	84.718	69.32			145.801	131.754	36.192	54.303		93.569	88.116	103.175	91.604
96.479	97.35	70.172	78.143		83.962	107.202	82.513	102.047			105.714	121.203	70.869	70.062		97.843	67.008	71.711	92.17			44.835	101.558	121.95	99.708		112.441	92.611	87.607	83.805
116.919	63.063	100.309	61.854		111.644	84.83	98.292	80.957			93.397	101.674	109.002	56.019		117.919	97.998	92.551	71.486			144.242	122.965	63.175	37.669		99.488	107.843	84.1	85.033
77.273	95.904	74.588	94.38		95.643	94.756	91.539	93.785			103.48	61.673	65.095	107.681		100.623	77.61	68.955	81.389			131.98	116.421	61.802	57.848		100.598	95.955	88.71	91.2
92.582	52.389	99.203	97.97		103.205	80.786	95.207	96.526			104.274	81.137	109.877	92.818		96.422	81.528	89.996	84.936			94.31	136.271	103.685	33.786		90.552	101.197	94.082	90.633
96.012	85.859	102.799	57.474		105.171	91.309	97.903	81.341			84.847	98.519	112.934	69.502		98.621	95.001	96.69	72.125			122.333	67.625	67.922	110.171		104.241	112.158	73.455	86.61
89.589	53.589	74.483	124.483		99.422	78.192	93.362	104.747			99.9	78.939	76.555	107.925		78.557	65.696	85.557	89.85			29.176	96.801	124.449	117.625		95.696	91.828	94.747	94.193
													87.079	101.93		109.331		76.524	97.414
Gephyrin NUMBER					Gephyrin SIZE						GABA NUMBER					GABA SIZE						VIAAT NUMBER					VIAAT SIZE
Stratum lacunosum moleculare					Stratum lacunosum moleculare						Stratum lacunosum moleculare					Stratum lacunosum moleculare						Stratum lacunosum moleculare					Stratum lacunosum moleculare
WT	Nlgn2 KO	MDGA1 KO	dKO		WT	Nlgn2 KO	MDGA1 KO	dKO			WT	Nlgn2 KO	MDGA1 KO	dKO		WT	Nlgn2 KO	MDGA1 KO	dKO			WT	Nlgn2 KO	MDGA1 KO	dKO		WT	Nlgn2 KO	MDGA1 KO	dKO
70.067	137.268	107.153	93.287		84.268	98.706	104.667	94.293			63.903	83.278	95.888	116.57		95.723	84.496	92.748	88.67			41.794	90.532	117.918	168.931		98.94	86.825	93.022	95.136
107.256	103.172	103.472	93.874		107.855	102.93	93.258	77.892			115.51	108.161	103.764	90.31		119.21	98.967	75.631	67.829			186.241	154.027	51.505	109.913		104.606	117.127	87.353	104.014
127.816	81.041	116.11	82.807		90.297	101.876	92.456	97.306			89.813	111.395	115.291	104.896		92.801	87.967	89.543	91.326			65.068	47.424	162.241	118.977		92.149	93.292	77.823	96.097
116.27	91.032	111.869	88.604		116.88	86.397	101.921	76.737			115.351	84.825	110.703	94.402		108.645	65.026	81.549	69.715			62.277	156.819	138.363	83.547		115.084	104.405	78.324	85.38
81.332	64.939	124.904	101.816		98.854	95.05	94.429	93.601			98.651	80.937	108.38	119.576		110.03	99.376	70.345	83.271			65.237	151.042				97.313	115.356	89.502	89.493
86.739	102.538	116.682	98.696		93.854	89.085	99.591	99.405			105.788	97.973	126.336	97.726		90.774	74.452	89.334	87.822			179.384	39.712				88.447	87.937
110.519	109.521	89.04			98.433	101.272	99.481	82.749			111.274	91.082	108.764	81.176		82.092	79.39	86.456	73.885								103.462
					109.559	89.813		112.837			99.711	99.031	89.982	102.362		100.725	100.236	87.919	92.854
														116.343			79.284		93.709

## Sheet: Supplementary Table 3
Gephyrin NUMBER					Gephyrin SIZE						GABA NUMBER					GABA SIZE						VIAAT NUMBER					VIAAT SIZE
Stratum oriens					Stratum oriens						Stratum oriens					Stratum oriens						Stratum oriens					Stratum oriens
WT	Nlgn2 KO	MDGA2 Het	MDGA2 Het / Nlgn2 KO		WT	Nlgn2 KO	MDGA2 Het	MDGA2 Het / Nlgn2 KO			WT	Nlgn2 KO	MDGA2 Het	MDGA2 Het / Nlgn2 KO		WT	Nlgn2 KO	MDGA2 Het	MDGA2 Het / Nlgn2 KO			WT	Nlgn2 KO	MDGA2 Het	MDGA2 Het / Nlgn2 KO		WT	Nlgn2 KO	MDGA2 Het	MDGA2 Het / Nlgn2 KO
58.18	55.57	124.38	57.55		87.07	87.54	114.76	86.58			70.12	45.99	152.66	51.85		92.73	78.81	108.85	70.69			140.785	81.808	124.944	24.814		111.543	105.122	99.931	70.833
111.46	105.05	140.53	50.17		101.82	105.98	103.75	91.44			147.96	86.12	147.96	24.26		104.92	82.38	104.92	74.38			40.708	98.169	153.896	66.055		78.955	101.373	93.015	103.073
84.19	90.8	125.71	78.47		92.89	98.16	92.88	89.54			76.03	57.28	161.33	42.68		95.08	75.76	102.12	83.45			29.361	64.151	58.263	83.215		83.716	86.322	85.459	120.279
68.57	79.57	127.28	95.4		94.74	87.38	104.71	88.79			70.3	61.9	178.29	60.3		85.82	87.12	64.51	74.82			148.288	40.111	52.974	82.025		115.893	91.507	84.687	90.473
152.13	100.14	120.68	68.88		100.47	89.13	94.51	107.92			66.76	81.51	181.63	55.89		104.11	81.97	126.63	65.48			117.621	77.257	44.089	38.327		98.338	99.811	85.2	100.495
90.78	74.1	78.79	105.85		112.87	90.72	95.05	99.89			123.44	72.15	143.47	17.75		94.27	84.03	106.32	89.89			117.751	129.709	63.641	57.032		102.145	110.871	91.663	85.115
140.04	56.68	82.1	56		87.18	81.12	94.26	86.7			83.56	105.23	97.76	112.7		110.26	77.67	96.9	71.91			105.486	103.718				109.409	99.961		82.298
83.94	118.7	118.64	98.28		107.79	81.82	87.88	94.26			122.15	72.92	65.66	73.13		104.24	86.67	72.89	82.66
85.6	89.13	104.82	94.25		113.57	95.36	84.83	107.06			121.76	120.47	73.21	98.27		110.29	102.03	92.45	83.33
127.66	98.97	50.05			101.59	96.31	94.21	90.78			107.12	129.6	97.12	41.46		98.27	105.26	88.79	71.46
97.46		74.44						92.43			111.71	130.43	56.05	68.8				79.26	77
											99.1		59.83	76.8				82.49
Gephyrin NUMBER					Gephyrin SIZE						GABA NUMBER					GABA SIZE						VIAAT NUMBER					VIAAT SIZE
Stratum pyramidale					Stratum pyramidale						Stratum pyramidale					Stratum pyramidale						Stratum pyramidale					Stratum pyramidale
WT	Nlgn2 KO	MDGA2 Het	MDGA2 Het / Nlgn2 KO		WT	Nlgn2 KO	MDGA2 Het	MDGA2 Het / Nlgn2 KO			WT	Nlgn2 KO	MDGA2 Het	MDGA2 Het / Nlgn2 KO		WT	Nlgn2 KO	MDGA2 Het	MDGA2 Het / Nlgn2 KO			WT	Nlgn2 KO	MDGA2 Het	MDGA2 Het / Nlgn2 KO		WT	Nlgn2 KO	MDGA2 Het	MDGA2 Het / Nlgn2 KO
131.36	61.78	106.87	38.39		104.06	75.69	104.3	85.56			100.17	76.6	114.29	34.96		131.63	69.89	95.84	49.48			112.718	89.833	81.69	81.759		101.6	102.96	98.335	108.907
66.1	90.97	68.57	112.76		108.17	82.52	88.7	90.21			99.41	61.83	102.66	62.13		92.94	77.19	103.5	73.21			48.288	122.783	89.758	105.172		81.184	107.534	111.542	111.542
54.81	111.37	99.11	73.11		89.26	103.12	84.84	92.38			92.31	109.66	51.16	72.9		91.57	96.27	73.22	85.78			72.36	86.462	108.411	98.767		91.145	93.974	108.047	118.637
150.13	93.58	67.95	26.74		92.66	104.59	106.05	90.92			89.45	76.62	107.3	52.65		75.7	90.26	109.57	71.32			31.704	50.845	61.219	123.965		63.208	89.269	108.711	103.476
123.49	48.57	95.33	71.01		99.61	77.92	101.16	89.31			91.41	46.49	115.95	71.77		101.39	96.55	83.58	65.31			177.199	45.972	18.864	107.61		151.576	88.646	102.37	105.913
87.74	107.02	63.09	80.55		92.43	101.6	86.27	92.8			89.21	68.06	94.79	74.67		122.01	61.17	83.6	80.06			76.679	98.187	83.525	58.767		98.712	104.808	107.572	79.935
76.07	101.5	102.11	58.72		108.36	85.06	83.39	90.11			99.87	90.57	71.57	75.08		99.77	93.03	77.46	76.59			102.532	103.527	101.175	27.862		116.723	107.572	128.809	97.306
116.45	94.3	47.07	80.58		105.76	90.19	83.55	82.18			113.89	58.73	92.35	54.09		80.28	98.71	89.14	78.72			178.52	133.548	26.071			95.852	89.836
93.86	89.16	66.64	88.74		99.68	91.87	95.88				124.27	113.61	44.44	37.25		99.22	104.61	74.02	69
												111.17	53.33			105.49	100.35	82.8	58.2
Gephyrin NUMBER					Gephyrin SIZE						GABA NUMBER					GABA SIZE						VIAAT NUMBER					VIAAT SIZE
Stratum radiatum					Stratum radiatum						Stratum radiatum					Stratum radiatum						Stratum radiatum					Stratum radiatum
WT	Nlgn2 KO	MDGA2 Het	MDGA2 Het / Nlgn2 KO		WT	Nlgn2 KO	MDGA2 Het	MDGA2 Het / Nlgn2 KO			WT	Nlgn2 KO	MDGA2 Het	MDGA2 Het / Nlgn2 KO		WT	Nlgn2 KO	MDGA2 Het	MDGA2 Het / Nlgn2 KO			WT	Nlgn2 KO	MDGA2 Het	MDGA2 Het / Nlgn2 KO		WT	Nlgn2 KO	MDGA2 Het	MDGA2 Het / Nlgn2 KO
69.29	35.95	121.83	100.9		90.31	89.77	107.17	90.63			90.75	26.13	140.43	17.65		93.3	79.79	121.06	60.64			44.049	113.14	97.49	99.45		73.678	105.016	108.079	106.928
121.75	71.21	123.64	102.61		101.11	98.37	96.39	96.89			75.4	103.13	90.29	4.72		108.45	86.98	94.95	83.48			56.864	92.158	120.668	84.439		87.457	96.057	108.6	101.588
102.21	101.43	106.21	94.75		83.49	96.74	103.21	99.08			89.21	50.75	129.49	23.76		94.28	73.94	109.23	76.18			8.835	29.593	70.855	110.598		83.751	98.002	93.864	118.085
68.42	71.54	117.63	76.5		95.67	90.46	93.37	98.37			64.43	67.43	111.9	79.92		80.88	86.95	138	73.84			162.689	38.333	42.51	89.388		124.91	89.275	80.068	99.449
109.64	80.09	91.38	83.88		94.95	92.14	90.46	108.28			114.87	75.51	127.9	72.03		99.44	76.01	101.72	78.56			135.24	89.983	39.519	68.251		102.903	105.814	79.364	105.621
72.84	84.99	60.72	102.31		114.38	89.52	91.35	86.27			87.59	49.9	99.73	41.67		97.91	72.66	92.23	100.51			189.955	84.062	47.109			111.347	107.845	91.463	83.047
150.8	100.03	74.85	83.19		106.1	104.29	85.86	94.26			159.82	62.11	77.76	116.54		119.45	79.4	79.83	72.31			102.369	120.896	62.613			115.954	110.326	85.705	81.718
129.48	111.71	83.88	96.63		109.5	98.81	85.68	84.5			121.81	75.6	52.26	57.59		97.86	93.43	88.77	79.04
37.27	113.59	142.62			112.46	101.02	100.34	87.19			80.65	128.64	56.77	77.6		110.61	102.62	89.33	86.05
143.62		43.71			92.03			90.76			101.45	118.02	63.06	59.42		97.84	87.64	83.12	70.32
94.68		77.33									114.02	67.95	53.5	58.82				101.63	79.55
													87.85	61.96
Gephyrin NUMBER					Gephyrin SIZE						GABA NUMBER					GABA SIZE						VIAAT NUMBER					VIAAT SIZE
Stratum lacunosum moleculare					Stratum lacunosum moleculare						Stratum lacunosum moleculare					Stratum lacunosum moleculare						Stratum lacunosum moleculare					Stratum lacunosum moleculare
WT	Nlgn2 KO	MDGA2 Het	MDGA2 Het / Nlgn2 KO		WT	Nlgn2 KO	MDGA2 Het	MDGA2 Het / Nlgn2 KO			WT	Nlgn2 KO	MDGA2 Het	MDGA2 Het / Nlgn2 KO		WT	Nlgn2 KO	MDGA2 Het	MDGA2 Het / Nlgn2 KO			WT	Nlgn2 KO	MDGA2 Het	MDGA2 Het / Nlgn2 KO		WT	Nlgn2 KO	MDGA2 Het	MDGA2 Het / Nlgn2 KO
102.29	106.05	93.92	137.83		93.09	91.51	103.13	90.51			96.11	71.8	95.66	22.92		87.68	82.42	102.36	75.1			128.644	51.475	20.248	4.48		126.795	104.371	89.158	82.3
64.84	98.57	72.2	97.28		111.24	94.61	86.45	93.11			68.61	86.28	90.35	76.71		100.01	72.18	94.45	81.06			25.725	75.988	56.257	46.167		83.862	109.176	108.421	109.686
70.25	104.14	91.19	130.88		84.56	97.9	107.56	98.6			117.5	88.79	136.2	27.74		78.95	86.47	97.11	72.08			137.801	25.15	57.812	45.322		85.501	136.952	102.323	105.625
162.2	114.72	120.77	110.29		83.09	99.34	102.72	79.4			83.88	77.52	121.8	109.98		102	81.87	86.35	72.35			122.42	13.149	14.944	48.006		82.597	86.104	75.078	107.998
98.27	98.69	100.75	111.16		108.2	96.14	95.37	99.84			116.09	97.94	70.67	91		93.1	74.68	77.65	77.45			85.41	45.869	5.891	26.808		120.453	59.763	92.261	103.806
98.64	90.36	64.58	85.17		99.47	92.41	86.86	96.38			97.86	94.36	68.71	88.49		128.15	83.99	77.67	79.22				83.177	9.75	39.246		82.782	110.141	45.601	94.406
134.63	79.12	93.14	99.39		103	87.37	90.52	97.33			66.2	84.74	69.04	55.55		117.06	95.9	88.94	86.32					63.177	20.202		118.01		106.906	93.645
40.04	92.17	67.52	95.3		117.06	92.59	80.54	89.54			101.08		67.9	82.07		86.77	96.38	75.5	74.24					16.058					80.83
118.62	109.04	112.17			85.63	97.53	96.85	92.14			152.67		75.82	89.94		111.82	84.68	94.82	83.97
110.21		82.25			111.92		85.66	89.47					25.98			94.46
		77.89			102.74		92.57

## Sheet: Supplementary Table 4
Membrane resistance (MOhm)						Membrane capacitance (pF), proximal compartments						Membrane capacitance (pF), distal compartments						Resting membrane potential (mV)						AP firing threshold (mV)						AP amplitude (mV)						AP maximum rate of rise (mV/ms)
WT	Nlgn2 KO	MDGA1 KO	dKO			WT	Nlgn2 KO	MDGA1 KO	dKO			WT	Nlgn2 KO	MDGA1 KO	dKO			WT	Nlgn2 KO	MDGA1 KO	dKO			WT	Nlgn2 KO	MDGA1 KO	dKO			WT	Nlgn2 KO	MDGA1 KO	dKO			WT	Nlgn2 KO	MDGA1 KO	dKO
155.699	149.624	120.147	140.217			31.893	48.462	50.516	52.47			66.723	134.394	147.762	137.909			-51.79	-50.48	-44.84	-55.85			-49.823	-42.134	-47.502	-47.418			127.734	116.906	127.804	114.373			650	614.8	556.4	594.8
74.908	102.353	124.726	125.649			43.948	44.843	29.06	50.12			144.637	114.353	114.729	162.615			-60.31	-54.36	-49.51	-57.58			-44.123	-43.512	-48.552	-40.919			121.763	112.933	116.43	113.324			649.7	517	519.5	597.1
108.507	125.87	121.038	89.867			45.844	47.315	29.972	54.082			130.793	82.615	90.359	147.258			-65.54	-54.24	-50.66	-58.52			-42.237	-48.585	-51.167	-48.26			109.166	114.981	109.537	111.576			459.4	514.7	459.4	803.1
75.989	141.787	162.883	90.811			52.575	42.669	37.539	40.236			172.717	92.522	115.588	130.781			-66.66	-62.76	-51.25	-49.8			-47.625	-40.775	-47.313	-48.323			111.726	126.848	109.564	116.834			585.2	635.5	496.6	678.1
112.32	131.087	200.592	124.338			29.392	41.719	38.855	38.039			120.067	87.359	103.607	74.581			-70.44	-50.3	-56.95	-59.88			-46.794	-45.243	-49.127	-47.842			120.447	118.354	110.997	120			514.1	686.1	602.5	846.2
120.37	147.685	135.836	108.705			43.017	22.439	30.401	31.923			128.212	74.408	119.774	106.033			-54.8	-74.04	-58.27	-61.32			-37.139	-43.511	-47.711	-44.082			122.215	126.634	112.088	124.316			629.1	740.4	671.5	705.8
92.802	154.159	331.861	122.921			66.811	27.48	17.197	44.166			162.983	59.188	63.896	111.666			-56.78	-49.015	-50.19	-46.5			-39.462	-47.301	-47.418	-39.429			111.094	106.537	114.399	129.441			489.4	390.9	519.3	861.3
101.208	81.798	148.138	340.501			39.82	47.823	37.995	35.445			155.174	96.791	107.454	107.911			-61.66	-43.64	-68.42	-60.55			-45.386	-42.267	-47.1	-42.876			123.212	114.388	109.799	115.777			608.7	402.03	480.2	651.6
113.408	69.853	99.129	122.557			42.909	19.646	62.708	36.42			126.167	46.33	118.275	121.82			-65.92	-46.49	-56.3	-65.17			-42.16	-43.622	-45.443	-40.717			126.608	113.426	119.277	126.532			655.6	447.7	643.6	800.9
90.989	108.558	107.318	104.597			31.506	23.701	39.985	41.568			96.294	89.094	114.419	116.046			-67.31	-57.98	-60.69	-64.42			-39.31	-38.064	-37.51	-46.291			115.693	124.497	134.403	127.236			701.8	470.2	693.5	759.7
85.913	113.134	107.107	84.43			50.515	46.462	27.461	41.961			144.251	114.408	85.371	110.09			-67.53	-57.64	-59.69	-56.19			-47.14	-42.342	-39.48	-45.737			115.315	115.538	124.084	117.772			565.3	577	735.5	586.3
176.311	104.396	132.51	81.932			30.261	36.726	46.843	49.075			90.444	66.928	118.798	159.342			-52.83	-67.26	-64.715	-59.57			-43.201	-46.744	-46.339	-40.57			119.675	119.594	133.819	130.318			576.7	719.7	736.1	649.6
110.372	125.329	120.596	105.506			24.032	48.923	26.642	42.726			79.668	103.305	74.325	142.359			-46.095	-53.15	-50.61	-69.29			-45.686	-46.798	-45.634	-40.549			118.953	112.86	123.854	127.114			542	579.2	660.7	822.1
95.358	110.64	119.667	134.321			43.347	75.277	57.059	56.255			132.039	151.113	127.315	120.347			-61.4	-56.83	-51.41	-65.17			-40.099	-40.876	-47.478	-44.105			113.809	122.059	128.959	112.655			523.8	755.7	687.7	660.5
152.324	19.772	136.018	113.682			28.607	46.467	51.347	41.082			64.434	132.464	114.42	114.931			-52.87	-67.36	-53.83	-55.7			-45.838	-43.026	-43.417	-46.399			120.287	121.704	134.266	124.81			588.9	827.3	624.7	741.8
111.044	103.204	59.98	98.863			41.567	66.62	58.554	46.21			118.741	164.671	120.785	131.106			-49.98	-69.89	-49.23	-72.86			-47.36		-41.837	-47.644			111.306		119.158	127.156			503		747.5	671.7
122.424	119.193	138.381	108.095			27.467	52.241	47.87	43.689			90.349	120.821	134.827	150.553			-45.62		-53.205	-59.685			-45.606		-48.778	-46.017			110.435		121.26	121.654			427.3		684.6	824.1
74.333	65.561	89.757	53.163			67.061	65.977	43.858	43.495			149.245	186.22	106.466	214.354			-45.74		-63.49	-60.5			-42.761		-42.108	-46.446			118.117		128.464	119.721			616.4		704.2	698.6
122.742	78.649	127.939	86.643			47.414	55.63	36.331	43.669			141.61	184.949	119.669	151.326			-58.27		-56.3				-48.16		-45.814				119.033		137.995	116.003			694.3		807.3	726.2
144.312	74.561	120.47	74.202			29.773	49.381	39.783	56.232			102.055	125.205	98.578	158.135			-66.74		-53.62				-47.748		-42.563				121.592		115.957				667.8		527.1
116.422	76.608	199.472	94.323			92.444	60.278	24.117	34.313			76.15	121.657	71.167	117.963			-55.99		-52.65						-47.609						111.36						676
88.008	107.696	135.217	91.104			31.943	47.909	30.033	24.554			106.346	132.034	90.959	69.656					-52.2						-43.816						117.404						593.3
74.945	101.725	130.889	82.233			36.627	59.46	37.828	53.368			105.719	142.877	94.91	116.525					-65.6						-41.753						126.475						527.8
62.241	91.41	110.36	67.458			40.929	34.754	34.087	39.653			128.926	101.409	99.945	113.192											-44.218						113.348
89.209	81.211	110.631	88.355			42.994	45.9	27.75	79.425			140.525	118.532	107.81	64.16
85.889	88.081	76.742	78.994			44.677	38.346	58.717	49.392			129.697	108.554	127.721	115.144
103.464	19.203	78.779	79.689			28.362	35.32	45.445	50.451			117.853	83.484	128.474	135.09
91.493	46.757	87	83.004			32.328	74.31	41.807	64			104.902	144.434	131.432	166.949
75.546	99.589	74.228	75.053			55.139	31.282	45.103	64.576			159.288	73.01	148.833	120.648
89.581	99.224	87.073	77.699			40.266	43.434	36.71	59.649			131.763	70.685	126.717	133.155
92.271	51	76.192	90.387			38.009	0.783	46.276	34.263			146.103	99.707	115.169	92.674
82.555	77.787	93.289	108.034			34.338	45.832	34.298	56.545			138.047	148.554	92.512	113.349
139.04	84.635	94.392	80.21			36.243	59.447	23.586	53.035			106.082	167.575	79.589	119.349
73.343	78.693	84.981	89.28			69.484	45.346	47.276	35.062			180.13	110.531	128.443	83.496
84.58		61.578	65.416			29.785		50.546	57.905			93.505		141.837	176.547
66.469		89.262	70.067			49.584		33.71	42.517			98.188		69.66	150.397
61.985		77.595				66.043		29.353				161.504		111.828
		76.246						42.465						108.144
		91.594						32.064						104.233
		76.694						41.474						135.726
		82.639						45.156						147.114
Membrane resistance (MOhm)						Membrane capacitance (pF), proximal compartments						Membrane capacitance (pF), distal compartments						Resting membrane potential (mV)						AP firing threshold (mV)						AP amplitude (mV)						AP maximum rate of rise (mV/ms)
WT	Nlgn2 KO	MDGA2 Het	MDGA2 Het / Nlgn2 KO			WT	Nlgn2 KO	MDGA2 Het	MDGA2 Het / Nlgn2 KO			WT	Nlgn2 KO	MDGA2 Het	MDGA2 Het / Nlgn2 KO			WT	Nlgn2 KO	MDGA2 Het	MDGA2 Het / Nlgn2 KO			WT	Nlgn2 KO	MDGA2 Het	MDGA2 Het / Nlgn2 KO			WT	Nlgn2 KO	MDGA2 Het	MDGA2 Het / Nlgn2 KO			WT	Nlgn2 KO	MDGA2 Het	MDGA2 Het / Nlgn2 KO
121.386	143.602	98.605	119.065			38.894	43.984	41.954	39.183			93.36	92.767	138.029	94.656			-59.96	-54.19	-44.37	-50.89			-31.353	-40.974	-43.786	-46.982			110.572	115.768	110.944	114.964			706.4	606.4	507.6	662.7
124.507	112.108	103.264	97.727			37.206	45.239	64.383	35.469			97.624	105.153	141.272	76.127			-49.43	-60.19	-63.01	-47.08			-49.175	-39.643	-44.088	-43.555			122.477	125.388	121.458	108.99			811.9	620.7	705.5	541.7
145.753	89.515	100.934	141.974			34.926	57.8678	38.425	32.09			94.823	132.053	111.93	65.228			-52.585	-45.83	-48.75	-54.11			-46.757	-43.997	-45.176	-47.384			114.216	127.458	128.259	111.269			545.5	699.2	853.7	590.4
132.059	80.737	159.228	99.0008			33.551	62.899	39.256	49.686			83.307	100.283	134.889	129.025			-58.6	-67.19	-61.37	-53.59			-45.73	-42.96	-36.38	-44.005			113.819	117.064	121.94	111.166			525.7	682.2	665.6	775.4
155.364	94.783	115.824	97.873			35.622	43.046	36.573	40.063			91.053	93.876	11.543	150.323			-54.71	-63.002	-53.33	-69.21			-46.32	-51.36	-45.682	-44.928			111.619	109.993	116.979	116.205			717.8	506.4	703.1	665.6
107.418	114.511	84.758	163.366			47.219	32.781	37.055	26.372			105.849	79.412	16.135	97.903			-52.01	-59.49	-60.61	-63.065			-50.705	-45.529	-44.921	-44.167			120.714	111.677	127.697	125.34			791.5	612.4	920.1	789.1
93.897	108.07	101.528	125.46			47.681	36.268	49.931	34.189			101.132	103.213	149.17	104.622			-54.88	-59.59	-62.89	-65.36			-50.151	-43.782	-45.745	-48.293			122.119	123.511	118.166	115.509			638.7	553.9	636.9	631.4
73.92	91.454	198.838	123.923			43.411	42.82	41.638	46.398			122.054	128.975	108.073	87.727			-55.44	-57.95	-54.87	-53.56			-43.104	-45.225	-48.713	-49.176			110.743	126.301	124.575	119.398			620.6	748.6	710.4	699
75.303	87.297	118.152	130.07			44.117	34.288	42.982	30.871			127.53	96.067	109.101	96.957			-68.01	-49.07	-52.67	-51.695			-43.764	-45.603	-45.439	-45.917			114.635	111.827	123.858	117.225			724.4	592.5	702	584.6
91.14	101.056	126.927	166.831			39.522	36.971	39.48	44.254			129.556	109.752	135.535	107.076			-62.276	-67.21	-54.115	-65.21			-43.738	-45.524	-46.608	-48.707			111.33	120.87	121.248	119.215			625	748.7	784.6	739.7
106.955	73.086	70.13	143.822			50.114	73.322	44.043	41.384			134.921	144.216	109.092	94.328			-66.37	-55.82	-66.135	-64.545			-50.12	-44.93	-41.737	-40.182			115.169	122.383	123.14	116.039			564.7	792.7	663.6	481.4
87.514	106.29	78.55	77.109			44.644	50.924	40.626	59.534			119.088	145.062	72.463	146.836			-59.83	-68.45	-57.08	-44.09			-43.712	-43.11	-46.367	-44.385			120.109	130.731	121.388	115.096			670.9	876.1	738.7	551.7
103.851	95.987	168.441	119.084			51.751	43.973	23.409	26.582			116.846	129.412	53.261	90.266			-57.01	-65.6	-64.01	-47.575			-40.48	-47.479	-46.146	-45.99			118.644	119.277	118.638	111.35			757	670.3	758.2	535.6
97.279	139.541	108.506	115.683			36.814	31.746	40.461	36.45			62.338	103.309	123.265	90.275			-60.58	-57.12	-52.45	-55.04			-43.864	-47.938	-48.205	-44.094			122.232	113.986	114.197	134.498			782.8	654.3	791.2	808.1
70.331	122.322	84.074	116.966			39.234	34.036	38.374	49.767			102.45	103.158	142.868	120.191			-64.76	-63.79	-62.5	-58.51			-49.635	-50.08	-47.525	-48.023			118.878	116.567	119.285	119.532			693.9	684.6	750	753.1
11.397	114.161	101.985	128.831			42.652	31.347	43.018	74.793			14.272	110.734	103.738	136.581			-68.09	-58.48	-51.71	-60.255			-48.421	-43.522	-51.248	-45.383			116.804	113.711	118.651	117.389			679.8	478.1	856.5	733.1
104.497	116.127	159.539	95.955			47.096	30.839	46.694	53.405			114.996	102.508	125.83	124.872			-60.425	-59.29	-59.07	-46.86			-45.707	-45.349	-47.166	-44.934			120.445	124.754	115.385	113.893			663.5	706.1		548.1
124.625	96.254	103.547	109.69			28.929	44.422	35.504	57.222			120.954	85.467	107.055	133.64			-53.09	-66.285					-44.67	-52.006					119.368	113.241					732.2	546.4
74.028	77.05	85.121	93.731			30.093	44.658	37.931	58.298			116.441	102.593	103.307	141.364			-59.44	-68.96					-48.233						122.234						870.3
52.395	89.565	77.305	127.036			51.069	43.079	40.603	13.052			151.627	121.831	98.863	14.155			-59.21
109.653	98.753	115.139	90.471			33.776	31.326	34.725	45.39			86.19	94.036	82.661	121.34
76.508	126.423	131.618	111.765			58.881	36.767	18.563	42.328			138.867	96.069	55.572	105.666
83.894	88.949	75.405	78.766			77.013	32.951	44.426	60.92			138.817	75.602	124.958	140.189
115.721	80.997	72.219	88.335			44.433	53.082	43.315	36.831			145.253	132.132	127.438	121.757
106.849	76.558	75.555	70.919			44.214	57.704	42.646	74.366			156.562	112.124	125.712	149.635
100.833	92.716	100.798	87.443			34.345	30.085	32.196	35.527			81.832	68.414	88.371	98.022
77.427	90.536	86.089	84.52			53.182	47.644	42.405	40.525			95.369	128.78	124.452	104.992
130.772	109.468	79.216	50.173			31.294	42.407	39.345	51.971			67.814	139.995	140.693	134.993
63.438	98.023	63.415	67.876			49.245	41.088	38.363	35.135			123.248	83.124	125.9	95.385
70.756	80.055	65.685	85.55			52.879	69.305	41.127	28.557			137.631	135.2	145.035	98.607
45.048	76.047	75.216	74.855			41.716	69.7	29.515	25.517			114.859	150.413	113.664	81.513
81.089	102.561	96.905	72.778			53.334	49.689	31.704	46.648			174.272	97.681	70.722	126.133
94.378	77.703	71.865	71.932			61.575	61.733	54.362	57.692			175.385	143.345	126.755	142.204
72.832	79.732	77.099	123.043			64.711	49.311	39.664	23.486			155.572	79.335	115.156	77.96
50.872	77.942	74.679	95.178			40.468	54.485	46.781	38.698			124.093	105.832	113.759	134.192
65.578		78.967				88.61		57.535				164.993		97.33
86.091						42.942						99.563
105.875						55.538						148.01
94.903						28.301						110.985
108.219						36.06						102.979
80.703						55.268						130.765

## Sheet: Supplementary Table 5
PSD-95 NUMBER				PSD-95 SIZE				vGluT1 NUMBER				vGluT1 SIZE
Stratum oriens				Stratum oriens				Stratum oriens				Stratum oriens
WT	MDGA1 KO			WT	MDGA1 KO			WT	MDGA1 KO			WT	MDGA1 KO
130.2	52.31			111.79	88.28			126.29	97.44			111.58	103.69
73.09	109.42			96.58	103.5			65.9	157.82			107.47	107.8
99.75	82.75			96.8	103.27			121.69	102.04			96.84	118.43
92.08	90.43			97.76	102.31			116.57	107.16			100.6	114.67
111.9	70.6			105.04	95.03			106.58	117.14			101.72	113.56
92.98	89.53			92.03	108.05			62.97	160.75			81.78	133.49
PSD-95 NUMBER				PSD-95 SIZE				vGluT1 NUMBER				vGluT1 SIZE
Stratum pyramidale				Stratum pyramidale				Stratum pyramidale				Stratum pyramidale
WT	MDGA1 KO			WT	MDGA1 KO			WT	MDGA1 KO			WT	MDGA1 KO
140.95	29			104.43	95.24			142.73	118.03			93.86	109.39
89.9	80.05			112.81	86.85			106.31	154.45			101.33	101.91
65.65	104.3			97.88	101.79			159.82	100.94			121.59	81.66
90.87	79.08			88.66	111.01			33.53	227.24			80.5	122.75
122.14	47.81			99.65	100.02			120.35	140.41			99.65	103.59
90.48	79.47			96.57	103.09			37.25	223.51			103.07	100.18
PSD-95 NUMBER				PSD-95 SIZE				vGluT1 NUMBER				vGluT1 SIZE
Stratum radiatum				Stratum radiatum				Stratum radiatum				Stratum radiatum
WT	MDGA1 KO			WT	MDGA1 KO			WT	MDGA1 KO			WT	MDGA1 KO
153.6	46.78			118.08	87.58			130.75	92.56			121.08	106.73
117.79	82.6			111.03	94.63			149.92	73.4			131.44	96.36
40.53	159.86			83.36	122.3			96.49	126.82			81.32	146.49
90.13	110.26			93.87	111.79			57.59	165.73			78.35	149.46
107.53	92.85			102.38	103.27			109.19	114.12			110.74	117.07
90.42	109.96			91.29	114.37			56.08	167.24			77.07	150.74
PSD-95 NUMBER				PSD-95 SIZE				vGluT1 NUMBER				vGluT1 SIZE
Stratum lacunosum moleculare				Stratum lacunosum moleculare				Stratum lacunosum moleculare				Stratum lacunosum moleculare
WT	MDGA1 KO			WT	MDGA1 KO			WT	MDGA1 KO			WT	MDGA1 KO
138.24	50.97			111.12	82.7			119.63	65.37			103.82	89.36
98.61	90.6			102.5	91.32			120.8	64.2			113.06	80.12
72.26	116.95			97.01	96.82			131.36	53.64			111.34	81.84
82.99	106.22			89.87	103.95			75.18	109.81			88.01	105.16
109.35	79.86			96.65	97.17			98.27	86.73			94.91	98.27
98.54	90.67			102.84	90.98			54.77	130.23			88.86	104.32

## Sheet: Supplementary Table 6
												Membrane capacitance (pF), proximal compartments				Membrane capacitance (pF), distal compartments
mEPSC frequency (s-1)				mEPSC amplitude (pA)				Membrane resistance (MOhm)
WT	MDGA1 KO			WT	MDGA1 KO			WT	MDGA1 KO			WT	MDGA1 KO			WT	MDGA1 KO
0.121	0.1031			7.96	6.99			190.724	204.568			49.756	20.804			144.215	90.081
0.1986	0.1014			7.69	8.92			178.658	178.063			22.992	26.708			81.23	105.096
0.0869	0.1625			7.49	10.56			162.484	152.06			23.519	19.864			106.186	127.475
0.1056	0.1283			10.02	10.02			163.484	167.359			27.6	19.38			164.335	89.579
0.1027	0.1463			7.74	11.64			171.459	158.734			51.822	22.976			148.742	113.153
0.1294	0.05324			10.57	6.54			163.858	119.633			37.401	25.13			120.358	99.985
0.1493	0.2827			9.32	8.9			209.804	121.525			22.426	25.191			114.351	117.341
0.1338	0.09375			9.66	9.03			184.059	127.182			18.787	24.828			85.459	86.578
0.1297	0.124			9.63	9.43			138.243	166.206			40.012	26.234			149.261	99.353
0.1131	0.06538			9.37	9.81			158.796	173.447			36.209	21.043			162.637	102.745
0.06396	0.1028			10.16	10.91			146.417	130.581			36.933	24.172			128.546	103.083
0.112	0.1693			8.35	9.15			173.36	131.313			33.517	25.382			159.443	126.8
0.1112	0.1814			9.17	9.88			121.897	132.852			35.524	24.54			135.186	132.927
0.08503	0.1368			9.53	9.21			153.43	126.376			31.185	26.985			174.838	152.123
0.1871	0.09062			9.33	9.05			133.47	161.624			26.983	24.739			109.43	144.002
0.0789	0.1212			10.67	9.57			153.073	174.721			40.667	27.833			169.744	127.722
0.1165	0.239			8.8	10.87			162.287	195.697			19.937	18.342			119.086	98.752
0.07757	0.2303			9.91	12.12			184.606	159.834			32.283	24.103			160.87	119.683
0.07299	0.2383			10.23	8.83			166.779	135.838			31.708	25.243			159.519	143.613
0.1476	0.133			10.1	8.93			137.403	134.063			33.561	29.865			137.895	154.542
0.1237	0.1752			10.7	10.6			184.413	108.883			35.492	29.506			158.021	122.058
0.1854	0.1116			11.34	11.39				190.155			26.124				146.838	99.712
0.06633				8.9					95.141							86.62	144.308
